# Supplementary material for: Abnormal expression of bHLH3 disrupts a flavonoid homeostasis network, causing differences in pigment composition among mulberry fruits
Source: PubMed Central journal article supplement (PMC7261776; doi:10.1038/s41438-020-0302-8), 2020-06-01
Supplement: 41438_2020_302_MOESM3_ESM.pdf [file 41438_2020_302_MOESM3_ESM.pdf]

|         |          |         |       |      |          |            |                                                           |              |          |         |         |          |          |          |          |          |          |          |          |          |
|---------|----------|---------|-------|------|----------|------------|-----------------------------------------------------------|--------------|----------|---------|---------|----------|----------|----------|----------|----------|----------|----------|----------|----------|
| Mul0145 | Positive | 449.1   | 287.3 | 2.45 | 449.1    | Protonated | Cyanidin 3-O-glucoside (Kuromanin)                        | Anthocyanins | 9        | 9       | 9       | 35400000 | 36500000 | 31700000 | 9        | 9        | 9        | 40700000 | 40600000 | 40300000 |
| Mul0159 | Positive | 535.1   | 287.4 | 2.81 | 535.1    | Protonated | Cyanidin 3-O-malonylhexoside                              | Anthocyanins | 9        | 9       | 9       | 2590000  | 2270000  | 2380000  | 9        | 9        | 9        | 88300    | 103000   | 85500    |
| Mul0150 | Positive | 595     | 287.9 | 2.6  | 595      | Protonated | Cyanidin 3-O-rutinoside (Keracyanin)                      | Anthocyanins | 18600000 | 2560000 | 51800   | 29000000 | 28000000 | 28400000 | 13500000 | 20700000 | 18800000 | 42200000 | 38400000 | 41300000 |
| Mul0484 | Negative | 489.1   | 285.3 | 2.82 | 490.1    | [M-H]-     | Cyanidin O-acetylhexoside                                 | Anthocyanins | 243000   | 215000  | 292000  | 9        | 9        | 9        | 205000   | 194000   | 231000   | 162000   | 170000   | 148000   |
| Mul0460 | Negative | 465.1   | 285.3 | 2.41 | 466.1    | [M-H]-     | Cyanidin O-syringic acid                                  | Anthocyanins | 9        | 9       | 9       | 91500000 | 1.36E+08 | 1.38E+08 | 4150000  | 6540000  | 7230000  | 1.17E+08 | 1.18E+08 | 79500000 |
| Mul0165 | Positive | 303     | 149.3 | 2.9  | 303.24   | Protonated | Delphinidin                                               | Anthocyanins | 96800    | 67700   | 97400   | 14400    | 9960     | 13700    | 33100    | 41800    | 36600    | 37100    | 33500    | 27700    |
| Mul0135 | Positive | 465.1   | 303.1 | 2.3  | 465.1    | Protonated | Delphinidin 3-O-glucoside (Mirtillin)                     | Anthocyanins | 7950000  | 6120000 | 9300000 | 9        | 9        | 9        | 115000   | 141000   | 157000   | 290000   | 255000   | 442000   |
| Mul0180 | Positive | 637.1   | 303.5 | 3.16 | 637.1    | Protonated | Delphinidin O-malonyl-malonylhexoside                     | Anthocyanins | 9        | 9       | 9       | 11800    | 10500    | 8350     | 15300    | 10600    | 9650     | 6800     | 6280     | 4660     |
| Mul0160 | Positive | 493     | 331.7 | 2.81 | 493      | Protonated | Malvidin 3-O-galactoside                                  | Anthocyanins | 9        | 9       | 9       | 60600    | 157000   | 52700    | 26300    | 37900    | 44100    | 339000   | 136000   | 196000   |
| Mul0163 | Positive | 493.2   | 331.6 | 2.86 | 493.2    | Protonated | Malvidin 3-O-glucoside (Oenin)                            | Anthocyanins | 9        | 5030    | 24800   | 74900    | 172000   | 61900    | 32600    | 34100    | 38500    | 395000   | 161000   | 212000   |
| Mul0148 | Positive | 433.1   | 271   | 2.58 | 433.1    | Protonated | Pelargonidin 3-O-beta-D-glucoside (Callistephin chloride) | Anthocyanins | 9        | 9       | 9       | 9        | 9        | 9        | 1910000  | 2920000  | 4630000  | 45100000 | 47400000 | 55300000 |
| Mul0146 | Positive | 595     | 271.8 | 2.45 | 595      | Protonated | Pelargonin                                                | Anthocyanins | 12600    | 7790    | 104000  | 142000   | 160000   | 135000   | 10600    | 16800    | 20900    | 86300    | 68600    | 71700    |
| Mul0173 | Positive | 463.123 | 301.4 | 3    | 463.123  | Protonated | Peonidin O-hexoside                                       | Anthocyanins | 9        | 9       | 9       | 8790000  | 7250000  | 6860000  | 225000   | 232000   | 269000   | 3280000  | 3370000  | 3160000  |
| Mul0561 | Negative | 253.06  | 253.1 | 4.57 | 254.058  | [M-H]-     | 7,4'-Dihydroxyflavone                                     | Flavone      | 4280     | 8270    | 11400   | 6270     | 2580     | 2660     | 17100    | 12900    | 16500    | 8560     | 6360     | 9160     |
| Mul0580 | Negative | 283.069 | 268   | 6.77 | 284.069  | [M-H]-     | Acacetin                                                  | Flavone      | 7820     | 5910    | 17900   | 9        | 9        | 9        | 9        | 9        | 9        | 2230     | 3990     | 2960     |
| Mul0488 | Negative | 487.1   | 283.2 | 2.93 | 488.1    | [M-H]-     | Acacetin O-acetyl hexoside                                | Flavone      | 92200    | 49800   | 100000  | 9        | 9        | 9        | 9        | 9        | 9        | 26900    | 21800    | 19400    |
| Mul0569 | Negative | 491.1   | 287.3 | 5.18 | 492.1    | [M-H]-     | Acetyl-eriodictyol O-hexoside                             | Flavone      | 9        | 9       | 9       | 9470     | 11500    | 12600    | 12000    | 17600    | 13300    | 6920     | 9280     | 11300    |
| Mul0272 | Positive | 271.053 | 215.1 | 5.48 | 270.0528 | [M+H]+     | Apigenin                                                  | Flavone      | 112000   | 140000  | 382000  | 27000    | 35500    | 34300    | 122000   | 97700    | 337000   | 142000   | 151000   | 147000   |
| Mul0220 | Positive | 433.106 | 313.1 | 3.73 | 432.1056 | [M+H]+     | Apigenin 5-O-glucoside                                    | Flavone      | 28100    | 23000   | 102000  | 784000   | 909000   | 692000   | 46200    | 70600    | 159000   | 440000   | 484000   | 497000   |
| Mul0542 | Negative | 431.1   | 269.2 | 4.07 | 432.1    | [M-H]-     | Apigenin 7-O-glucoside (Cosmosiin)                        | Flavone      | 25100    | 14800   | 41000   | 13800    | 9        | 9        | 61300    | 50000    | 66700    | 44000    | 33900    | 40600    |
| Mul0248 | Positive | 519     | 271.7 | 4.36 | 518      | [M+H]+     | Apigenin O-malonylhexoside                                | Flavone      | 47100    | 25300   | 57200   | 35700    | 34600    | 44400    | 567000   | 766000   | 687000   | 268000   | 267000   | 254000   |
| Mul0550 | Negative | 445.085 | 269   | 4.33 | 446.085  | [M-H]-     | Baicalein-7-O-glucuronide (Baicalin)                      | Flavone      | 9        | 9       | 9       | 18200    | 24500    | 15600    | 9        | 9        | 9        | 5060     | 5230     | 5110     |
| Mul0271 | Positive | 273.07  | 153.1 | 5.45 | 272.069  | [M+H]+     | Butin                                                     | Flavone      | 426000   | 426000  | 136000  | 1190000  | 1140000  | 852000   | 240000   | 294000   | 307000   | 509000   | 503000   | 493000   |
| Mul0291 | Positive | 255.058 | 69.7  | 6.73 | 254.0579 | [M+H]+     | Chrysin                                                   | Flavone      | 36200    | 36500   | 62400   | 38100    | 39400    | 40300    | 23500    | 21800    | 35000    | 37000    | 38300    | 33700    |
| Mul0259 | Positive | 417.1   | 255.7 | 4.84 | 416.1    | [M+H]+     | Chrysin 5-O-glucoside (Toringin)                          | Flavone      | 9790     | 7990    | 38100   | 27400    | 18300    | 25400    | 12800    | 12700    | 18300    | 18000    | 16800    | 14200    |
| Mul0256 | Positive | 417.2   | 255.8 | 4.67 | 416.2    | [M+H]+     | Chrysin O-hexoside                                        | Flavone      | 9        | 9       | 9       | 14500    | 14500    | 11000    | 8100     | 7720     | 24700    | 9280     | 10100    | 10400    |
| Mul0266 | Positive | 503     | 255.6 | 5.24 | 502      | [M+H]+     | Chrysin O-malonylhexoside                                 | Flavone      | 45300    | 26100   | 54900   | 98700    | 88200    | 84100    | 110000   | 139000   | 296000   | 103000   | 98600    | 88500    |
| Mul0274 | Positive | 301.063 | 286.1 | 5.56 | 300.0634 | [M+H]+     | Chrysoeriol                                               | Flavone      | 31700    | 30300   | 89700   | 151000   | 233000   | 183000   | 64400    | 56600    | 114000   | 88100    | 91900    | 89500    |
| Mul0231 | Positive | 463.123 | 313.9 | 3.96 | 462.123  | [M+H]+     | Chrysoeriol 5-O-hexoside                                  | Flavone      | 9        | 15000   | 27800   | 168000   | 220000   | 136000   | 61500    | 87000    | 87600    | 89000    | 65900    | 75800    |
| Mul0241 | Positive | 463.2   | 287.7 | 4.14 | 462.2    | [M+H]+     | Chrysoeriol 7-O-hexoside                                  | Flavone      | 19300    | 10500   | 21000   | 171000   | 243000   | 161000   | 59900    | 77700    | 90500    | 75300    | 81800    | 78100    |
| Mul0535 | Negative | 607.1   | 299.1 | 3.93 | 608.1    | [M-H]-     | Chrysoeriol 7-O-rutinoside                                | Flavone      | 9        | 9       | 9       | 219000   | 201000   | 212000   | 230000   | 254000   | 198000   | 337000   | 189000   | 282000   |
| Mul0530 | Negative | 503.1   | 341.3 | 3.88 | 504.1    | [M-H]-     | Chrysoeriol O-acetylhexoside                              | Flavone      | 263000   | 384000  | 406000  | 22300    | 9        | 17400    | 2860000  | 2740000  | 2710000  | 1430000  | 859000   | 1280000  |
| Mul0237 | Positive | 625.1   | 331.7 | 4.03 | 624.1    | [M+H]+     | Chrysoeriol O-hexosyl-O-hexoside                          | Flavone      | 30900    | 22900   | 44100   | 9        | 9        | 9        | 9        | 9        | 9        | 16500    | 19000    | 18100    |
| Mul0198 | Positive | 509.3   | 347.9 | 3.47 | 508.3    | [M+H]+     | Limocitrin O-hexoside                                     | Flavone      | 9        | 9       | 9       | 1030000  | 1010000  | 1050000  | 1010000  | 855000   | 985000   | 714000   | 665000   | 614000   |
| Mul0262 | Positive | 287.1   | 287.1 | 4.91 | 286.1    | [M+H]+     | Luteolin                                                  | Flavone      | 1630000  | 1890000 | 4210000 | 219000   | 470000   | 252000   | 156000   | 121000   | 1060000  | 1110000  | 1010000  | 1030000  |
| Mul0193 | Positive | 611.1   | 449.4 | 3.38 | 610.1    | [M+H]+     | Luteolin 3',7-di-O-glucoside                              | Flavone      | 597000   | 492000  | 1020000 | 93100    | 99600    | 113000   | 191000   | 192000   | 210000   | 266000   | 290000   | 287000   |
| Mul0221 | Positive | 449     | 287.1 | 3.76 | 448      | [M+H]+     | Luteolin 7-O-glucoside                                    | Flavone      | 1020000  | 1230000 | 1750000 | 5190000  | 9        | 9        | 9        | 9        | 9        | 3380000  | 2580000  | 2850000  |
| Mul0517 | Negative | 447.3   | 285.1 | 3.7  | 448.101  | [M-H]-     | Luteolin 7-O-glucoside (Cynaroside)                       | Flavone      | 384000   | 413000  | 525000  | 1250000  | 985000   | 646000   | 317000   | 333000   | 362000   | 631000   | 588000   | 578000   |
| Mul0467 | Negative | 771.1   | 609.5 | 2.47 | 772.1    | [M-H]-     | Luteolin O-hexosyl-O-hexosyl-O-hexoside                   | Flavone      | 3580000  | 2810000 | 4040000 | 6160     | 9        | 7310     | 22400    | 41800    | 57200    | 113000   | 149000   | 159000   |
| Mul0294 | Positive | 403.132 | 373.1 | 6.84 | 402.132  | [M+H]+     | Nobiletin                                                 | Flavone      | 65800    | 88500   | 94900   | 80900    | 81400    | 118000   | 69700    | 78200    | 68600    | 66300    | 75900    | 83800    |
| Mul0267 | Positive | 477.2   | 328   | 5.28 | 476.2    | [M+H]+     | O-methylChrysoeriol 7-O-hexoside                          | Flavone      | 9        | 9       | 9       | 3400     | 9        | 4600     | 15600    | 5760     | 27800    | 7610     | 7040     | 7020     |
| Mul0292 | Positive | 287.084 | 287.1 | 6.73 | 286.084  | [M+H]+     | sakuranetin                                               | Flavone      | 9        | 9       | 9       | 9        | 9        | 4780     | 21600    | 9        | 9        | 4870     | 4440     | 4140     |
| Mul0203 | Positive | 479.118 | 302.8 | 3.54 | 478.118  | [M+H]+     | Selgin 5-O-hexoside                                       | Flavone      | 46200    | 30700   | 22700   | 17600    | 11500    | 9670     | 13700    | 9        | 9        | 24100    | 13900    | 18600    |
| Mul0243 | Positive | 565     | 317.8 | 4.17 | 564      | [M+H]+     | Selgin O-malonylhexoside                                  | Flavone      | 35400    | 41500   | 32700   | 11900    | 10400    | 9490     | 120000   | 175000   | 165000   | 60900    | 62700    | 57300    |
| Mul0223 | Positive | 509.2   | 347.6 | 3.82 | 508.2    | [M+H]+     | Syringetin 5-O-hexoside                                   | Flavone      | 9        | 9       | 9       | 68900    | 95500    | 94100    | 107000   | 104000   | 87900    | 95200    | 101000   | 98700    |
| Mul0235 | Positive | 509.3   | 283.6 | 4.02 | 508.3    | [M+H]+     | Syringetin 7-O-hexoside                                   | Flavone      | 9        | 9       | 9       | 20300    | 19800    | 24700    | 9        | 9        | 9        | 6470     | 5590     | 8580     |
| Mul0303 | Positive | 373.121 | 373.1 | 7.32 | 372.121  | [M+H]+     | Tangeretin                                                | Flavone      | 60600    | 96900   | 81600   | 86300    | 75700    | 122000   | 69300    | 71200    | 67900    | 71300    | 78500    | 87000    |
| Mul0553 | Negative | 301     | 149.1 | 4.38 | 302.043  | [M-H]-     | Tricetin                                                  | Flavone      | 89100    | 83800   | 78700   | 19500    | 30300    | 20200    | 15800    | 18400    | 22900    | 37200    | 38000    | 43000    |
| Mul0533 | Negative | 491.1   | 329.3 | 3.9  | 492.1    | [M-H]-     | Tricin 5-O-hexoside                                       | Flavone      | 648000   | 483000  | 1060000 | 768000   | 664000   | 762000   | 76600    | 67700    | 53400    | 444000   | 440000   | 427000   |
| Mul0536 | Negative | 637.1   | 269.3 | 3.93 | 638.1    | [M-H]-     | Tricin 5-O-rutinoside                                     | Flavone      | 9        | 9       | 9       | 23800    | 16200    | 24000    | 6630     | 5530     | 5160     | 6340     | 5740     | 3180     |
| Mul0547 | Negative | 491.1   | 431.2 | 4.14 | 492.1    | [M-H]-     | Tricin 7-O-hexoside                                       | Flavone      | 26200    | 25500   | 26400   | 9        | 9        | 9        | 9        | 9        | 9        | 14300    | 11100    | 9120     |
| Mul0189 | Positive | 655.2   | 331.7 | 3.35 | 654.2    | [M+H]+     | Tricin 7-O-hexosyl-O-hexoside                             | Flavone      | 4560     | 9       | 9       | 51600    | 52100    | 44500    | 31500    | 33700    | 39900    | 42000    | 29300    | 29800    |
| Mul0515 | Negative | 521.1   | 329.3 | 3.68 | 522.1    | [M-H]-     | Tricin O-saccharic acid                                   | Flavone      | 2720000  | 2400000 | 1720000 | 2150000  | 1800000  | 2570000  | 613000   | 617000   | 496000   | 1960000  | 1860000  | 1850000  |
| Mul0514 | Negative | 535     | 329.4 | 3.68 | 536      | [M-H]-     | Tricin O-sinapic acid                                     | Flavone      | 67800    | 29900   | 75700   | 630000   | 512000   | 524000   | 80900    | 97600    | 69100    | 211000   | 214000   | 203000   |

|         |          |         |       |      |           |        |                                                            |                      |          |          |          |          |          |          |          |          |          |          |          |          |
|---------|----------|---------|-------|------|-----------|--------|------------------------------------------------------------|----------------------|----------|----------|----------|----------|----------|----------|----------|----------|----------|----------|----------|----------|
| Mul0556 | Negative | 287.06  | 125.1 | 4.43 | 288.063   | [M-H]- | Aromadedrin (Dihydrokaempferol)                            | Flavonol             | 1940000  | 2220000  | 480000   | 608000   | 944000   | 935000   | 746000   | 486000   | 751000   | 1100000  | 962000   | 1010000  |
| Mul0191 | Positive | 321.05  | 153.1 | 3.36 | 320.053   | [M+H]+ | Dihydromyricetin                                           | Flavonol             | 9        | 9        | 9        | 83200    | 42100    | 75600    | 96400    | 72200    | 39400    | 35600    | 34600    | 30900    |
| Mul0538 | Negative | 303.058 | 125.1 | 3.94 | 304.058   | [M-H]- | Dihydroquercetin (Taxifolin)                               | Flavonol             | 9570000  | 9690000  | 1680000  | 3970000  | 8010000  | 4790000  | 5240000  | 3630000  | 6870000  | 6130000  | 5800000  | 5750000  |
| Mul0577 | Negative | 329.1   | 314.3 | 5.76 | 330.1     | [M-H]- | Di-O-methylquercetin                                       | Flavonol             | 1820000  | 397000   | 1660000  | 273000   | 289000   | 270000   | 2150000  | 1250000  | 2550000  | 1230000  | 1010000  | 1090000  |
| Mul0211 | Positive | 289     | 215.1 | 3.66 | 288.063   | [M+H]+ | Fustin                                                     | Flavonol             | 7610     | 7560     | 10200    | 18100    | 28900    | 28500    | 29200    | 26400    | 27300    | 15800    | 13000    | 13500    |
| Mul0565 | Negative | 675.2   | 513.2 | 4.83 | 676.237   | [M-H]- | Icariin (kaempferol 3,7-O-diglucoside 8-prenyl derivative) | Flavonol             | 29500    | 40100    | 27200    | 9850     | 9        | 9        | 9        | 9        | 9        | 18500    | 19400    | 16100    |
| Mul0210 | Positive | 625.169 | 317.1 | 3.64 | 624.169   | [M+H]+ | Isorhamnetin 3-O-neohesperidoside                          | Flavonol             | 9        | 9        | 9        | 122000   | 140000   | 120000   | 82400    | 86300    | 76700    | 55100    | 36200    | 68200    |
| Mul0227 | Positive | 479.2   | 317.8 | 3.86 | 478.2     | [M+H]+ | Isorhamnetin 5-O-hexoside                                  | Flavonol             | 103000   | 110000   | 84600    | 65900    | 72700    | 64000    | 201000   | 119000   | 365000   | 134000   | 147000   | 126000   |
| Mul0548 | Negative | 519.1   | 315.3 | 4.22 | 520.1     | [M-H]- | Isorhamnetin O-acetyl-hexoside                             | Flavonol             | 26200    | 23000    | 21900    | 2330     | 9        | 2160     | 81600    | 106000   | 106000   | 39000    | 44400    | 38400    |
| Mul0244 | Positive | 479.2   | 318   | 4.25 | 478.2     | [M+H]+ | Isorhamnetin O-hexoside                                    | Flavonol             | 98600    | 105000   | 94200    | 59400    | 57700    | 59400    | 196000   | 146000   | 380000   | 141000   | 117000   | 117000   |
| Mul0273 | Positive | 287.048 | 287   | 5.52 | 286.048   | [M+H]+ | Kaempferol                                                 | Flavonol             | 32900    | 41400    | 15200    | 17400    | 36500    | 34900    | 4660     | 7840     | 39300    | 25900    | 22400    | 24800    |
| Mul0213 | Positive | 579.2   | 433.1 | 3.67 | 578.164   | [M+H]+ | Kaempferol 3,7-dirhamnoside (Kaempferitrin)                | Flavonol             | 9        | 9        | 9        | 40600    | 33500    | 48400    | 9        | 17500    | 21700    | 13000    | 13800    | 13500    |
| Mul0528 | Negative | 447     | 284   | 3.86 | 448.101   | [M-H]- | Kaempferol 3-O-galactoside (Trifolin)                      | Flavonol             | 3090000  | 2350000  | 3810000  | 2600000  | 2120000  | 2930000  | 1230000  | 2180000  | 1690000  | 2520000  | 2420000  | 2590000  |
| Mul0238 | Positive | 449.1   | 287.6 | 4.03 | 448.1     | [M+H]+ | Kaempferol 3-O-glucoside (Astragalin)                      | Flavonol             | 343000   | 196000   | 356000   | 242000   | 232000   | 195000   | 85800    | 138000   | 108000   | 208000   | 193000   | 187000   |
| Mul0217 | Positive | 595.159 | 287   | 3.7  | 594.159   | [M+H]+ | Kaempferol 3-O-robinobioside (Biorobin)                    | Flavonol             | 9        | 9        | 9        | 17500000 | 17500000 | 15200000 | 2940000  | 4480000  | 2770000  | 6980000  | 7000000  | 6890000  |
| Mul0524 | Negative | 593.159 | 285.1 | 3.77 | 594.1585  | [M-H]- | Kaempferol 3-O-rutinoside (Nicotiflorin)                   | Flavonol             | 9        | 9        | 9        | 26800000 | 23500000 | 26100000 | 3010000  | 4190000  | 3560000  | 6980000  | 6990000  | 7390000  |
| Mul0503 | Negative | 739.22  | 593.3 | 3.28 | 740.216   | [M-H]- | Kaempferol-3-O-robinoside-7-O-rhamnoside (Robinin)         | Flavonol             | 9        | 9        | 9        | 37200    | 23500    | 29200    | 5820     | 8600     | 5220     | 7790     | 9270     | 7970     |
| Mul0264 | Positive | 333     | 305.2 | 4.96 | 332.053   | [M+H]+ | Laricitrin                                                 | Flavonol             | 9        | 6090     | 9        | 7490     | 11000    | 9710     | 8030     | 6100     | 11000    | 6450     | 5460     | 6220     |
| Mul0225 | Positive | 479     | 317.3 | 3.84 | 478       | [M+H]+ | methylquercetin O-hexoside                                 | Flavonol             | 75600    | 52600    | 69100    | 44200    | 52900    | 41200    | 164000   | 134000   | 290000   | 95400    | 98800    | 94100    |
| Mul0567 | Negative | 301     | 151.1 | 4.97 | 302.04265 | [M-H]- | Morin                                                      | Flavonol             | 52300    | 136000   | 18800    | 560000   | 1470000  | 722000   | 47600    | 50600    | 202000   | 519000   | 273000   | 378000   |
| Mul0554 | Negative | 317     | 179   | 4.39 | 318.038   | [M-H]- | Myricetin                                                  | Flavonol             | 11900    | 25500    | 9530     | 13500    | 26700    | 14600    | 8850     | 12300    | 35500    | 20400    | 16800    | 17600    |
| Mul0506 | Negative | 479.09  | 317.3 | 3.43 | 480.09    | [M-H]- | Myricetin 3-O-galactoside                                  | Flavonol             | 6220     | 9        | 4930     | 24300    | 15700    | 26800    | 9        | 3350     | 3630     | 8520     | 9740     | 7190     |
| Mul0263 | Positive | 303.043 | 303   | 4.92 | 302.043   | [M+H]+ | Quercetin                                                  | Flavonol             | 159000   | 194000   | 31600    | 238000   | 204000   | 279000   | 103000   | 50900    | 438000   | 167000   | 156000   | 156000   |
| Mul0229 | Positive | 435.085 | 303   | 3.91 | 434.0849  | [M+H]+ | Quercetin 3-alpha-L-arabinofuranoside (Avicularin)         | Flavonol             | 7700     | 8680     | 9790     | 300000   | 322000   | 255000   | 26400    | 42800    | 55000    | 95800    | 132000   | 91800    |
| Mul0516 | Negative | 463     | 301.1 | 3.68 | 464.096   | [M-H]- | Quercetin 3-O-glucoside (Isotrifoliin)                     | Flavonol             | 12500000 | 10300000 | 12900000 | 44800000 | 43200000 | 45000000 | 18400000 | 25700000 | 24200000 | 25900000 | 26600000 | 24900000 |
| Mul0201 | Positive | 611.153 | 303   | 3.51 | 610.153   | [M+H]+ | Quercetin 3-O-rutinoside (Rutin)                           | Flavonol             | 9        | 9        | 9        | 36900000 | 38300000 | 31300000 | 22900000 | 27300000 | 22600000 | 26900000 | 24900000 | 26100000 |
| Mul0239 | Positive | 465     | 302.9 | 4.04 | 464.096   | [M+H]+ | Quercetin 4'-O-glucoside (Spiraeoside)                     | Flavonol             | 17700000 | 12600000 | 16600000 | 29500000 | 31200000 | 31600000 | 21900000 | 25700000 | 24100000 | 26200000 | 25000000 | 24900000 |
| Mul0162 | Positive | 713.1   | 713.1 | 2.83 | 712.1     | [M+H]+ | Quercetin 5-O-malonylhexosyl-hexoside                      | Flavonol             | 403000   | 420000   | 453000   | 9        | 9        | 9        | 1770000  | 1610000  | 2090000  | 331000   | 385000   | 407000   |
| Mul0195 | Positive | 713.1   | 303.6 | 3.41 | 712.1     | [M+H]+ | Quercetin 7-O-malonylhexosyl-hexoside                      | Flavonol             | 169000   | 134000   | 162000   | 9        | 9        | 9        | 229000   | 199000   | 151000   | 105000   | 163000   | 112000   |
| Mul0219 | Positive | 611.2   | 303.7 | 3.73 | 610.2     | [M+H]+ | Quercetin 7-O-rutinoside                                   | Flavonol             | 9        | 9        | 9        | 37300000 | 33000000 | 34600000 | 21800000 | 23800000 | 22300000 | 24700000 | 24300000 | 23200000 |
| Mul0529 | Negative | 505.1   | 301.2 | 3.87 | 506.1     | [M-H]- | Quercetin O-acetylhexoside                                 | Flavonol             | 5310000  | 4110000  | 6100000  | 157000   | 142000   | 129000   | 27000000 | 30400000 | 20700000 | 16900000 | 14600000 | 15800000 |
| Mul0578 | Negative | 315     | 165.1 | 6.19 | 316.058   | [M-H]- | Rhamnetin (7-O-methyl quercetin)                           | Flavonol             | 5100     | 4890     | 7350     | 2190     | 9        | 9        | 3230     | 3000     | 3140     | 4140     | 3340     | 3480     |
| Mul0184 | Positive | 509.1   | 347.7 | 3.27 | 508.1     | [M+H]+ | Syringetin 3-O-hexoside                                    | Flavonol             | 9        | 9        | 9        | 181000   | 174000   | 222000   | 243000   | 195000   | 250000   | 127000   | 128000   | 98600    |
| Mul0555 | Negative | 657.1   | 495.3 | 4.43 | 658.1     | [M-H]- | Tricin 4'-O-(syringyl alcohol) ether 5-O-hexoside          | Flavonolignan        | 28000    | 38600    | 22300    | 21300    | 18000    | 25100    | 24900    | 23700    | 14500    | 17500    | 20200    | 19200    |
| Mul0187 | Positive | 627.1   | 447.3 | 3.33 | 626.1     | [M+H]+ | 6-C-hexosyl-hesperetin O-hexoside                          | Flavone C-glycosides | 1170000  | 1090000  | 1430000  | 208000   | 160000   | 259000   | 99200    | 115000   | 105000   | 524000   | 531000   | 451000   |
| Mul0164 | Positive | 611.1   | 329   | 2.9  | 610.1     | [M+H]+ | 6-C-hexosyl-luteolin O-hexoside                            | Flavone C-glycosides | 146000   | 144000   | 156000   | 9        | 9        | 9        | 27500    | 33800    | 17200    | 35900    | 24600    | 24200    |
| Mul0181 | Positive | 757.2   | 757   | 3.19 | 756.2     | [M+H]+ | 8-C-hexosyl-apigenin O-hexosyl-O-hexoside                  | Flavone C-glycosides | 9        | 9        | 9        | 35500    | 25000    | 42800    | 15500    | 12400    | 11700    | 14600    | 12000    | 17800    |
| Mul0152 | Positive | 627.1   | 430   | 2.65 | 626.1     | [M+H]+ | 8-C-hexosyl-hesperetin O-hexoside                          | Flavone C-glycosides | 15800000 | 14200000 | 19400000 | 2420000  | 1580000  | 2390000  | 7890000  | 8160000  | 10000000 | 5660000  | 5450000  | 5340000  |
| Mul0194 | Positive | 581.1   | 449.2 | 3.38 | 580.1     | [M+H]+ | 8-C-hexosyl-luteolin O-pentoside                           | Flavone C-glycosides | 20100    | 20400    | 9        | 45800    | 24700    | 28100    | 21300    | 18300    | 18800    | 16900    | 25700    | 23700    |
| Mul0228 | Positive | 433.113 | 271.7 | 3.88 | 432.113   | [M+H]+ | Apigenin C-glucoside                                       | Flavone C-glycosides | 26900    | 39700    | 66600    | 3080     | 9        | 2830     | 9        | 9        | 9        | 14400    | 15800    | 11000    |
| Mul0207 | Positive | 757.3   | 757.2 | 3.61 | 756.3     | [M+H]+ | C-hexosyl-apigenin O-caffeoylhexoside                      | Flavone C-glycosides | 9        | 9        | 9        | 5800     | 11900    | 16000    | 5490     | 7790     | 4690     | 6360     | 8790     | 12200    |
| Mul0206 | Positive | 757.2   | 757   | 3.6  | 756.2     | [M+H]+ | C-hexosyl-luteolin O-p-coumaroylhexoside                   | Flavone C-glycosides | 9        | 9        | 9        | 17500    | 28500    | 26700    | 12000    | 7290     | 6060     | 5090     | 10800    | 8340     |
| Mul0153 | Positive | 775.1   | 774.9 | 2.68 | 774.1     | [M+H]+ | Eriodictiol 6-C-hexoside 8-C-hexoside-O-hexoside           | Flavone C-glycosides | 9        | 9        | 9        | 28600    | 25100    | 27100    | 19500    | 30000    | 21600    | 11700    | 18500    | 15000    |
| Mul0169 | Positive | 613.1   | 300.3 | 2.97 | 612.1     | [M+H]+ | Eriodictiol C-hexosyl-O-hexoside                           | Flavone C-glycosides | 863000   | 773000   | 1120000  | 99300    | 84000    | 121000   | 81000    | 120000   | 108000   | 278000   | 307000   | 305000   |



|         |          |         |       |      |           |        |                                                        |                             |          |          |          |          |          |          |          |          |          |          |          |          |
|---------|----------|---------|-------|------|-----------|--------|--------------------------------------------------------|-----------------------------|----------|----------|----------|----------|----------|----------|----------|----------|----------|----------|----------|----------|
| Mul0501 | Negative | 449.1   | 329.3 | 3.21 | 450.1     | [M-H]- | Eriodictyol C-hexoside                                 | Flavone C-glycosides        | 2700000  | 1630000  | 1550000  | 5260000  | 7030000  | 4800000  | 1510000  | 1470000  | 1680000  | 3080000  | 3010000  | 2560000  |
| Mul0208 | Positive | 433.106 | 313.1 | 3.61 | 432.106   | [M+H]+ | Isovitexin                                             | Flavone C-glycosides        | 37600    | 35800    | 73200    | 3140     | 9        | 9        | 9        | 2150     | 9        | 14800    | 17400    | 16200    |
| Mul0212 | Positive | 611.2   | 299.8 | 3.67 | 610.2     | [M+H]+ | Luteolin 8-C-hexosyl-O-hexoside                        | Flavone C-glycosides        | 9        | 9        | 9        | 4870000  | 4560000  | 4030000  | 1230000  | 1550000  | 865000   | 1360000  | 1570000  | 1570000  |
| Mul0218 | Positive | 435.1   | 339.7 | 3.73 | 434.1     | [M+H]+ | Naringenin C-hexoside                                  | Flavone C-glycosides        | 21900    | 13700    | 19300    | 9        | 9        | 6680     | 4970     | 7550     | 9        | 4860     | 6570     | 11000    |
| Mul0240 | Positive | 477.1   | 298   | 4.06 | 476.1     | [M+H]+ | O-methylChrysoeriol 8-C-hexoside                       | Flavone C-glycosides        | 55400    | 44000    | 44800    | 9        | 9        | 9        | 9        | 9        | 9        | 16400    | 14000    | 12800    |
| Mul0222 | Positive | 419.1   | 383.9 | 3.79 | 418.1     | [M+H]+ | O-methylnaringenin C-pentoside                         | Flavone C-glycosides        | 9        | 12100    | 7410     | 26400    | 39500    | 38300    | 9        | 9        | 9        | 11900    | 8000     | 15100    |
| Mul0186 | Positive | 275     | 139.1 | 3.29 | 274.084   | [M+H]+ | Afzelechin (3,5,7,4'-Tetrahydroxyflavan)               | Flavanone                   | 16100    | 14300    | 2380     | 29200    | 47600    | 56400    | 35000    | 18000    | 54700    | 24900    | 24000    | 34900    |
| Mul0269 | Positive | 273.1   | 137.1 | 5.3  | 272.069   | [M+H]+ | Butein                                                 | Flavanone                   | 7220000  | 12100000 | 8890000  | 2190000  | 3000000  | 2370000  | 668000   | 826000   | 1960000  | 4610000  | 4580000  | 4930000  |
| Mul0260 | Positive | 289.063 | 153.1 | 4.85 | 288.063   | [M+H]+ | Eriodictyol                                            | Flavanone                   | 1420000  | 1730000  | 453000   | 12500000 | 7950000  | 6440000  | 710000   | 1320000  | 1380000  | 3460000  | 3310000  | 3450000  |
| Mul0250 | Positive | 537     | 289.7 | 4.39 | 536       | [M+H]+ | Eriodictyol O-malonylhexoside                          | Flavanone                   | 14800    | 9910     | 12700    | 481000   | 661000   | 335000   | 25200    | 76100    | 65000    | 117000   | 120000   | 104000   |
| Mul0276 | Positive | 303.079 | 303.1 | 5.63 | 302.079   | [M+H]+ | Hesperetin                                             | Flavanone                   | 9        | 9        | 9        | 27900    | 18000    | 17900    | 6640     | 8560     | 5980     | 6470     | 9960     | 7390     |
| Mul0531 | Negative | 463.132 | 301.1 | 3.88 | 464.132   | [M-H]- | Hesperetin 5-O-glucoside                               | Flavanone                   | 12600000 | 11100000 | 13000000 | 45000000 | 42700000 | 43500000 | 19600000 | 27000000 | 25100000 | 27100000 | 26700000 | 25000000 |
| Mul0546 | Negative | 609.2   | 301.3 | 4.09 | 610.19    | [M-H]- | Hesperetin 7-O-neohesperidoside (Neohesperidin)        | Flavanone                   | 9        | 9        | 9        | 7120000  | 6010000  | 5540000  | 747000   | 596000   | 628000   | 1930000  | 1550000  | 1430000  |
| Mul0233 | Positive | 611.19  | 303   | 3.99 | 610.19    | [M+H]+ | Hesperetin 7-rutinoside (Hesperidin)                   | Flavanone                   | 9        | 9        | 9        | 17600000 | 16900000 | 19800000 | 3140000  | 3510000  | 4390000  | 7080000  | 7500000  | 6800000  |
| Mul0457 | Negative | 625.2   | 463.3 | 2.26 | 626.2     | [M-H]- | Hesperetin O-hexosyl-O-hexoside                        | Flavanone                   | 9        | 9        | 9        | 5960     | 9        | 9        | 13500    | 14600    | 11600    | 7750     | 6680     | 4930     |
| Mul0534 | Negative | 549.2   | 387.3 | 3.93 | 550.2     | [M-H]- | Hesperetin O-malonylhexoside                           | Flavanone                   | 217000   | 209000   | 226000   | 53200    | 47600    | 63400    | 60800    | 49100    | 34700    | 128000   | 114000   | 131000   |
| Mul0575 | Negative | 301.1   | 151   | 5.55 | 302.27876 | [M-H]- | Homoeriodictyol                                        | Flavanone                   | 3270     | 5360     | 3780     | 11700    | 8070     | 8960     | 9        | 2090     | 9100     | 5130     | 4400     | 4630     |
| Mul0282 | Positive | 257     | 137.1 | 5.91 | 256.074   | [M+H]+ | Isoliquiritigenin                                      | Flavanone                   | 204000   | 357000   | 172000   | 904000   | 792000   | 651000   | 147000   | 142000   | 165000   | 342000   | 343000   | 367000   |
| Mul0261 | Positive | 257     | 137.1 | 4.87 | 256.074   | [M+H]+ | Liquiritigenin                                         | Flavanone                   | 9        | 6660     | 5780     | 47700    | 20300    | 19900    | 9        | 5960     | 9        | 9750     | 10500    | 11300    |
| Mul0573 | Negative | 271.069 | 151   | 5.41 | 272.0685  | [M-H]- | Naringenin                                             | Flavanone                   | 283000   | 301000   | 83100    | 787000   | 745000   | 544000   | 179000   | 215000   | 195000   | 344000   | 320000   | 333000   |
| Mul0541 | Negative | 433.121 | 122.9 | 4.05 | 434.1213  | [M-H]- | Naringenin 7-O-glucoside (Prunin)                      | Flavanone                   | 520000   | 365000   | 631000   | 2230000  | 2220000  | 1730000  | 449000   | 890000   | 512000   | 928000   | 1060000  | 975000   |
| Mul0268 | Positive | 273.07  | 153.1 | 5.3  | 272.069   | [M+H]+ | Naringenin chalcone                                    | Flavanone                   | 330000   | 340000   | 112000   | 1100000  | 935000   | 672000   | 188000   | 212000   | 241000   | 424000   | 406000   | 415000   |
| Mul0253 | Positive | 521     | 317.6 | 4.49 | 520       | [M+H]+ | Naringenin O-malonylhexoside                           | Flavanone                   | 8610     | 7670     | 14100    | 36800    | 49500    | 40800    | 74300    | 140000   | 113000   | 49700    | 40300    | 44400    |
| Mul0270 | Positive | 275.084 | 107   | 5.34 | 274.0841  | [M+H]+ | Phloretin                                              | Flavanone                   | 11500    | 6990     | 9        | 134000   | 129000   | 113000   | 9        | 4480     | 5960     | 37900    | 38800    | 35300    |
| Mul0295 | Positive | 257.1   | 153   | 6.85 | 256.074   | [M+H]+ | Pinocembrin (Dihydrochrysin)                           | Flavanone                   | 11600    | 5990     | 9        | 13600    | 23400    | 9420     | 10200    | 9540     | 62300    | 14800    | 16400    | 13300    |
| Mul0324 | Positive | 355.15  | 178.9 | 8.24 | 354.147   | [M+H]+ | Xanthohumol                                            | Flavanone                   | 9        | 9        | 9        | 9        | 9        | 9        | 6690     | 4460     | 4120     | 2470     | 2300     | 3210     |
| Mul0456 | Negative | 353.1   | 191.1 | 2.21 | 354.095   | [M-H]- | 1-O-Caffeoyl quinic acid                               | Quinate and its derivatives | 36200000 | 42500000 | 37000000 | 29700000 | 31900000 | 34200000 | 39900000 | 37200000 | 36000000 | 30300000 | 38100000 | 38400000 |
| Mul0197 | Positive | 369.1   | 207.5 | 3.47 | 368.1     | [M+H]+ | 1-O-Feruloyl quinic acid                               | Quinate and its derivatives | 1000000  | 1570000  | 1460000  | 85100    | 87000    | 115000   | 173000   | 115000   | 94600    | 517000   | 619000   | 719000   |
| Mul0167 | Positive | 369.1   | 177.5 | 2.94 | 368.1     | [M+H]+ | 3-O-Feruloyl quinic acid                               | Quinate and its derivatives | 33700    | 42500    | 36500    | 9        | 9        | 9        | 20300    | 8890     | 14200    | 8320     | 9540     | 11200    |
| Mul0508 | Negative | 337.1   | 190.9 | 3.44 | 338.1     | [M-H]- | 3-O-p-Coumaroyl quinic acid                            | Quinate and its derivatives | 8510000  | 7600000  | 7750000  | 11300000 | 10400000 | 11900000 | 14300000 | 11900000 | 10200000 | 11100000 | 10800000 | 9180000  |
| Mul0463 | Negative | 499.2   | 173.2 | 2.43 | 500.2     | [M-H]- | 3-O-p-coumaroyl quinic acid O-hexoside                 | Quinate and its derivatives | 9        | 9        | 4260     | 4990     | 9        | 9        | 29800    | 24200    | 15500    | 10400    | 4370     | 10600    |
| Mul0494 | Negative | 481.1   | 319.3 | 3.09 | 482.1     | [M-H]- | 3-O-p-coumaroyl shikimic acid O-hexoside               | Quinate and its derivatives | 9        | 9        | 9        | 44500    | 74900    | 36800    | 9        | 9        | 9        | 11900    | 15300    | 11600    |
| Mul0489 | Negative | 353.1   | 191.2 | 2.95 | 354.1     | [M-H]- | 4-O-Caffeoyl quinic acid (criptochlorogenic acid)      | Quinate and its derivatives | 69200    | 58900    | 68000    | 78100    | 66600    | 80100    | 64400    | 59000    | 44600    | 70600    | 62800    | 55800    |
| Mul0453 | Negative | 499.1   | 163.2 | 2.18 | 500.1     | [M-H]- | 5-O-p-coumaroyl quinic acid O-hexoside                 | Quinate and its derivatives | 15200    | 7760     | 11500    | 22900    | 17800    | 22600    | 31000    | 22200    | 18100    | 15300    | 14700    | 21400    |
| Mul0215 | Positive | 321.1   | 147.5 | 3.68 | 320.1     | [M+H]+ | 5-O-p-Coumaroyl shikimic acid                          | Quinate and its derivatives | 7020     | 4220     | 9        | 9        | 9        | 8530     | 1800000  | 1980000  | 974000   | 304000   | 288000   | 259000   |
| Mul0475 | Negative | 481.1   | 445.4 | 2.6  | 482.1     | [M-H]- | 5-O-p-coumaroyl shikimic acid O-hexoside               | Quinate and its derivatives | 9270     | 7410     | 11600    | 143000   | 162000   | 173000   | 15000    | 17000    | 15400    | 50100    | 46500    | 43700    |
| Mul0499 | Negative | 337     | 275.8 | 3.18 | 338       | [M-H]- | 5-O-p-Coumaroylquinic acid                             | Quinate and its derivatives | 83000    | 82600    | 79400    | 61700    | 69400    | 78800    | 60700    | 43600    | 29900    | 65700    | 64200    | 61500    |
| Mul0478 | Negative | 353.095 | 191.1 | 2.69 | 354.0951  | [M-H]- | Chlorogenic acid (3-O-Caffeoylquinic acid)             | Quinate and its derivatives | 12100000 | 15200000 | 14600000 | 8760000  | 12200000 | 7060000  | 14800000 | 14500000 | 20500000 | 11500000 | 11400000 | 11200000 |
| Mul0202 | Positive | 369.111 | 163   | 3.52 | 368.111   | [M+H]+ | Chlorogenic acid methyl ester                          | Quinate and its derivatives | 9        | 9670     | 4240     | 29300    | 8500     | 28900    | 11000    | 6660     | 4830     | 10600    | 9870     | 10100    |
| Mul0445 | Negative | 355.1   | 181.2 | 1.97 | 356.1     | [M-H]- | Homovanilloyl quinic acid                              | Quinate and its derivatives | 5070000  | 3320000  | 4800000  | 9        | 9        | 9        | 9        | 9        | 9        | 1590000  | 1440000  | 1540000  |
| Mul0470 | Negative | 353     | 191.1 | 2.53 | 354.095   | [M-H]- | Neochlorogenic acid (5-O-Caffeoylquinic acid)          | Quinate and its derivatives | 62500000 | 56000000 | 42800000 | 53800000 | 55300000 | 54600000 | 58400000 | 57200000 | 54500000 | 54700000 | 51200000 | 51200000 |
| Mul0507 | Negative | 709.1   | 401.3 | 3.44 | 710.1     | [M-H]- | O-p-Coumaroyl quinic acid O-rutinoside derivative      | Quinate and its derivatives | 3700     | 3630     | 2550     | 3800     | 9        | 9        | 2510     | 3250     | 9        | 4120     | 3970     | 5200     |
| Mul0439 | Negative | 513.1   | 191.2 | 1.86 | 514.1     | [M-H]- | p-Coumaroyl quinic acid O-glucuronic acid              | Quinate and its derivatives | 87800    | 34700    | 78900    | 9        | 9        | 9        | 22800    | 12900    | 5300     | 21000    | 29400    | 22900    |
| Mul0442 | Negative | 371.1   | 179.2 | 1.92 | 372.1     | [M-H]- | Quinacyl syringic acid                                 | Quinate and its derivatives | 42900    | 38400    | 41800    | 174000   | 149000   | 188000   | 26800    | 61800    | 48700    | 100000   | 94500    | 99800    |
| Mul0413 | Negative | 191     | 85    | 1.22 | 192.063   | [M-H]- | Quinic acid                                            | Quinate and its derivatives | 37500000 | 29200000 | 25700000 | 1.04E+08 | 57700000 | 82500000 | 11800000 | 10600000 | 11000000 | 37300000 | 42400000 | 43400000 |
| Mul0446 | Negative | 369     | 191.1 | 1.98 | 370       | [M-H]- | Quinic acid O-glucuronic acid                          | Quinate and its derivatives | 54300    | 94900    | 68400    | 189000   | 136000   | 137000   | 81100    | 106000   | 77500    | 178000   | 80700    | 152000   |
| Mul0137 | Positive | 474.2   | 327.8 | 2.34 | 473.2     | [M+H]+ | 10-Formyl-THF                                          | Others                      | 940000   | 700000   | 888000   | 121000   | 108000   | 144000   | 677000   | 572000   | 472000   | 304000   | 295000   | 312000   |
| Mul0083 | Positive | 96.04   | 80.2  | 1.21 | 95.04     | [M+H]+ | 3-Hydroxypyridine                                      | Others                      | 6790     | 12000    | 5440     | 4420     | 6290     | 5570     | 6040     | 12100    | 8180     | 4840     | 4280     | 2600     |
| Mul0012 | Positive | 169.09  | 134.1 | 0.66 | 168.09    | [M+H]+ | 4-(Aminomethyl)-5-(hydroxymethyl)-2-methylpyridin-3-ol | Others                      | 18700    | 36800    | 15100    | 6330     | 9900     | 8300     | 9        | 9        | 9        | 12200    | 9230     | 13400    |
| Mul0147 | Positive | 144.1   | 142.9 | 2.55 | 143.1     | [M+H]+ | 4-Methyl-5-thiazoleethanol                             | Others                      | 9        | 5340     | 5540     | 7330     | 4080     | 6390     | 4390     | 4440     | 9        | 5940     | 5170     | 9150     |

|         |          |         |       |      |          |                    |                                               |                              |          |          |          |          |          |          |          |          |          |          |          |          |
|---------|----------|---------|-------|------|----------|--------------------|-----------------------------------------------|------------------------------|----------|----------|----------|----------|----------|----------|----------|----------|----------|----------|----------|----------|
| Mul0009 | Positive | 140     | 98.9  | 0.63 | 139.027  | [M+H] <sup>+</sup> | 4-Nitrophenol                                 | Others                       | 21000000 | 37200000 | 21500000 | 25500000 | 23200000 | 29800000 | 22700000 | 19200000 | 19100000 | 22000000 | 24200000 | 27100000 |
| Mul0101 | Positive | 137     | 110   | 1.37 | 136.039  | [M+H] <sup>+</sup> | Allopurinol                                   | Others                       | 67100    | 129000   | 60100    | 9300     | 17100    | 14200    | 18000    | 17100    | 15200    | 19700    | 30100    | 32600    |
| Mul0116 | Positive | 136.1   | 119.3 | 1.83 | 135.1    | [M+H] <sup>+</sup> | Aminopurine                                   | Others                       | 224000   | 325000   | 346000   | 54100    | 95700    | 50500    | 64100    | 57100    | 78200    | 156000   | 171000   | 165000   |
| Mul0166 | Positive | 491.1   | 329.7 | 2.92 | 490.1    | [M+H] <sup>+</sup> | Anisic acid O-feruloyl hexoside               | Others                       | 8370     | 9300     | 12700    | 35500    | 29800    | 33900    | 9        | 4870     | 10100    | 23800    | 22100    | 20400    |
| Mul0563 | Negative | 533.3   | 371.2 | 4.71 | 534.21   | [M-H] <sup>-</sup> | Arctiin                                       | Others                       | 17900    | 18900    | 39300    | 6090     | 13700    | 9340     | 16200    | 18500    | 12000    | 17300    | 15200    | 16300    |
| Mul0293 | Positive | 390.4   | 284.9 | 6.74 | 389.4    | [M+H] <sup>+</sup> | Azoxystrobin acid                             | Others                       | 131000   | 326000   | 201000   | 269000   | 259000   | 346000   | 155000   | 158000   | 182000   | 192000   | 240000   | 225000   |
| Mul0129 | Positive | 122     | 105.3 | 2.19 | 121      | [M+H] <sup>+</sup> | Benzamide                                     | Others                       | 4500     | 6270     | 5690     | 9360     | 9820     | 10300    | 21900    | 18400    | 24000    | 11900    | 13200    | 13200    |
| Mul0308 | Positive | 387.1   | 331.8 | 7.48 | 386.1    | [M+H] <sup>+</sup> | Cholesterol                                   | Others                       | 106000   | 138000   | 129000   | 152000   | 139000   | 196000   | 129000   | 124000   | 132000   | 110000   | 127000   | 151000   |
| Mul0285 | Positive | 343.1   | 240.9 | 6.39 | 342.1    | [M+H] <sup>+</sup> | Cocamidopropyl betaine                        | Others                       | 17200    | 21600    | 20200    | 20400    | 14500    | 17200    | 16600    | 15100    | 18500    | 18100    | 15300    | 19800    |
| Mul0298 | Positive | 302.4   | 284.9 | 7.15 | 301.4    | [M+H] <sup>+</sup> | D-erythro-Dihydrosphingosine                  | Others                       | 8460     | 8320     | 11900    | 137000   | 34700    | 107000   | 9290     | 9170     | 8130     | 18000    | 22600    | 18600    |
| Mul0016 | Positive | 106     | 88.1  | 0.68 | 105.079  | [M+H] <sup>+</sup> | Diethanolamine                                | Others                       | 44200    | 44800    | 54400    | 18300    | 40800    | 20100    | 26400    | 29200    | 40700    | 33000    | 37800    | 26700    |
| Mul0425 | Negative | 169     | 122.8 | 1.25 | 169.998  | [M-H] <sup>-</sup> | DI-Glyceraldehyde3-phosphate                  | Others                       | 24600    | 27500    | 24200    | 9        | 86900    | 9        | 41900    | 51400    | 48800    | 52900    | 56300    | 56900    |
| Mul0560 | Negative | 405.13  | 242.2 | 4.48 | 406.13   | [M-H] <sup>-</sup> | E-3,4,5'-Trihydroxy-3'-glucopyranosylstilbene | Others                       | 97100    | 95800    | 17300    | 9        | 9        | 9        | 9        | 9        | 9        | 36700    | 32100    | 39200    |
| Mul0003 | Positive | 142.1   | 82.9  | 0.57 | 141.1    | [M+H] <sup>+</sup> | Histidinol                                    | Others                       | 13100000 | 24400000 | 23100000 | 12100000 | 14300000 | 14700000 | 15400000 | 12800000 | 14300000 | 11700000 | 14400000 | 15900000 |
| Mul0099 | Positive | 138.091 | 77.2  | 1.28 | 137.091  | [M+H] <sup>+</sup> | Hydroxyphenethylamine                         | Others                       | 38900    | 54300    | 32600    | 33800    | 26100    | 62900    | 12200    | 10200    | 10800    | 12600    | 16400    | 12900    |
| Mul0362 | Negative | 179.157 | 87    | 0.74 | 180.0634 | [M-H] <sup>-</sup> | Inositol                                      | Others                       | 1430000  | 1090000  | 1700000  | 253000   | 240000   | 254000   | 230000   | 234000   | 204000   | 510000   | 490000   | 456000   |
| Mul0182 | Positive | 595.2   | 367.2 | 3.19 | 594.159  | [M+H] <sup>+</sup> | Isovitexin 7-O-glucoside (Saponarin)          | Others                       | 9        | 9        | 9        | 19700    | 11800    | 35700    | 30100    | 39400    | 26600    | 21500    | 14200    | 11400    |
| Mul0030 | Positive | 163     | 103   | 0.76 | 162.113  | [M+H] <sup>+</sup> | L-Carnitine                                   | Others                       | 25300    | 58700    | 31900    | 23000    | 19000    | 32500    | 44000    | 32300    | 29600    | 17300    | 35900    | 37200    |
| Mul0327 | Positive | 400.33  | 341.4 | 8.31 | 399.335  | [M+H] <sup>+</sup> | L-Palmitoylcarnitine                          | Others                       | 9        | 9        | 9        | 22600    | 10800    | 23600    | 11900    | 8510     | 4930     | 6170     | 8830     | 7710     |
| Mul0415 | Negative | 742.1   | 620.2 | 1.22 | 743.075  | [M-H] <sup>-</sup> | NADP                                          | Others                       | 74200    | 65000    | 80500    | 129000   | 135000   | 154000   | 108000   | 106000   | 97200    | 158000   | 110000   | 130000   |
| Mul0281 | Positive | 275.1   | 258.1 | 5.9  | 274.1    | [M+H] <sup>+</sup> | N-Lauryldiethanolamine                        | Others                       | 55100    | 46700    | 53100    | 96800    | 86100    | 101000   | 82200    | 92600    | 74200    | 65100    | 73300    | 72900    |
| Mul0370 | Negative | 140     | 78.5  | 0.76 | 141.019  | [M-H] <sup>-</sup> | O-Phosphorylethanolamine                      | Others                       | 21900    | 12900    | 20300    | 19200    | 29200    | 14000    | 33600    | 35800    | 37100    | 34300    | 24100    | 21700    |
| Mul0410 | Negative | 287.06  | 153.1 | 1.19 | 288.059  | [M-H] <sup>-</sup> | Orotidine                                     | Others                       | 66700    | 50500    | 39200    | 9500     | 13300    | 10800    | 9790     | 8780     | 5830     | 16100    | 16400    | 16800    |
| Mul0209 | Positive | 503.2   | 311.8 | 3.64 | 502.2    | [M+H] <sup>+</sup> | Phellodensin F                                | Others                       | 1360000  | 1080000  | 1960000  | 301000   | 169000   | 294000   | 254000   | 203000   | 123000   | 590000   | 674000   | 434000   |
| Mul0141 | Positive | 122.1   | 105   | 2.39 | 121.089  | [M+H] <sup>+</sup> | Phenethylamine                                | Others                       | 28400    | 68400    | 17900    | 28000    | 15000    | 39400    | 16900    | 10800    | 15300    | 21900    | 20800    | 20100    |
| Mul0348 | Positive | 149     | 121.3 | 9.57 | 148      | [M+H] <sup>+</sup> | Phthalic anhydride                            | Others                       | 42500    | 36100    | 40000    | 83700    | 50400    | 58900    | 74800    | 71900    | 60900    | 55500    | 60600    | 60200    |
| Mul0496 | Negative | 385.1   | 223.2 | 3.1  | 386.1    | [M-H] <sup>-</sup> | 1-O-beta-D-Glucopyranosyl sinapate            | Hydroxycinnamoyl derivatives | 116000   | 94900    | 260000   | 73500    | 60600    | 78700    | 584000   | 486000   | 447000   | 236000   | 210000   | 234000   |
| Mul0545 | Negative | 151.047 | 136.1 | 4.08 | 152.0473 | [M-H] <sup>-</sup> | 2-Methoxybenzoic acid                         | Hydroxycinnamoyl derivatives | 49200    | 35500    | 45100    | 12800    | 17300    | 21000    | 11300    | 4840     | 11000    | 27200    | 26000    | 29000    |
| Mul0204 | Positive | 167.063 | 149.1 | 3.57 | 166.063  | [M+H] <sup>+</sup> | 3-(4-Hydroxyphenyl)propionic acid             | Hydroxycinnamoyl derivatives | 43400    | 50700    | 39100    | 19500    | 24600    | 19900    | 19300    | 9        | 35200    | 30900    | 33000    | 18200    |
| Mul0568 | Negative | 237.084 | 103.1 | 5    | 238.0841 | [M-H] <sup>-</sup> | 3,4,5-Trimethoxycinnamic acid                 | Hydroxycinnamoyl derivatives | 19000    | 9        | 9        | 5330     | 7620     | 6490     | 7170     | 3540     | 3870     | 2860     | 3510     | 3210     |
| Mul0574 | Negative | 207.1   | 192.1 | 5.53 | 208.1    | [M-H] <sup>-</sup> | 3,4-Dimethoxycinnamic acid                    | Hydroxycinnamoyl derivatives | 9120     | 7830     | 10600    | 9        | 9        | 9        | 1650     | 9        | 9        | 6040     | 4460     | 3760     |
| Mul0540 | Negative | 193.058 | 134.1 | 4.01 | 194.0579 | [M-H] <sup>-</sup> | 3-Hydroxy-4-methoxycinnamic acid              | Hydroxycinnamoyl derivatives | 324000   | 351000   | 220000   | 111000   | 184000   | 175000   | 193000   | 210000   | 172000   | 228000   | 224000   | 229000   |
| Mul0572 | Negative | 177     | 145.2 | 5.36 | 178      | [M-H] <sup>-</sup> | 4-Methoxycinnamic acid                        | Hydroxycinnamoyl derivatives | 264000   | 261000   | 132000   | 2580     | 4350     | 3340     | 20600    | 12500    | 13200    | 95500    | 92100    | 91400    |
| Mul0178 | Positive | 207.1   | 147.4 | 3.1  | 206.1    | [M+H] <sup>+</sup> | 6-Hydroxymethylherniarin                      | Hydroxycinnamoyl derivatives | 195000   | 180000   | 264000   | 137000   | 97500    | 111000   | 221000   | 189000   | 174000   | 150000   | 182000   | 153000   |
| Mul0310 | Positive | 317.2   | 281.3 | 7.53 | 316.204  | [M+H] <sup>+</sup> | Cafestol                                      | Hydroxycinnamoyl derivatives | 17800    | 16200    | 8780     | 34600    | 22100    | 25800    | 29700    | 9010     | 18500    | 14700    | 12600    | 23500    |
| Mul0179 | Positive | 181.042 | 135.1 | 3.14 | 180.042  | [M+H] <sup>+</sup> | Caffeic acid                                  | Hydroxycinnamoyl derivatives | 23800    | 25300    | 20700    | 59600    | 57600    | 65900    | 78000    | 76700    | 54300    | 45000    | 40800    | 38600    |
| Mul0492 | Negative | 341     | 179.2 | 3.03 | 342      | [M-H] <sup>-</sup> | Caffeic acid O-glucoside                      | Hydroxycinnamoyl derivatives | 487000   | 479000   | 392000   | 280000   | 293000   | 340000   | 677000   | 651000   | 532000   | 478000   | 404000   | 430000   |
| Mul0279 | Positive | 165.1   | 95.5  | 5.88 | 164.1    | [M+H] <sup>+</sup> | Caffeic aldehyde                              | Hydroxycinnamoyl derivatives | 9040     | 4990     | 7390     | 7430     | 9        | 4150     | 10500    | 9680     | 6010     | 6620     | 7770     | 7140     |
| Mul0452 | Negative | 311.1   | 149.2 | 2.18 | 312.1    | [M-H] <sup>-</sup> | Caftaric acid                                 | Hydroxycinnamoyl derivatives | 9240     | 6520     | 10600    | 51300    | 43700    | 51700    | 9640     | 9        | 8800     | 20200    | 17900    | 15400    |
| Mul0571 | Negative | 147.052 | 61.8  | 5.22 | 148.0524 | [M-H] <sup>-</sup> | Cinnamic acid                                 | Hydroxycinnamoyl derivatives | 1240000  | 1200000  | 196000   | 43700    | 41300    | 30000    | 20500    | 18600    | 129000   | 410000   | 378000   | 366000   |
| Mul0477 | Negative | 341     | 179.1 | 2.62 | 342.132  | [M-H] <sup>-</sup> | Coniferin                                     | Hydroxycinnamoyl derivatives | 5730000  | 5180000  | 5850000  | 127000   | 115000   | 127000   | 2370000  | 1990000  | 1590000  | 929000   | 772000   | 795000   |
| Mul0519 | Negative | 179.079 | 146.1 | 3.71 | 180.079  | [M-H] <sup>-</sup> | Coniferyl alcohol                             | Hydroxycinnamoyl derivatives | 7970     | 5440     | 11000    | 12800    | 10500    | 9730     | 8230     | 10000    | 9        | 8050     | 9140     | 7740     |
| Mul0559 | Negative | 177.063 | 177.1 | 4.46 | 178.063  | [M-H] <sup>-</sup> | Coniferylaldehyde                             | Hydroxycinnamoyl derivatives | 381000   | 244000   | 714000   | 556000   | 416000   | 553000   | 525000   | 440000   | 304000   | 495000   | 451000   | 468000   |
| Mul0230 | Positive | 195.058 | 149.1 | 3.92 | 194.0579 | [M+H] <sup>+</sup> | Ferulic acid                                  | Hydroxycinnamoyl derivatives | 72600    | 44600    | 34000    | 18900    | 30800    | 33600    | 28000    | 35500    | 35100    | 40300    | 33200    | 35000    |
| Mul0188 | Positive | 375.2   | 137.6 | 3.34 | 374.2    | [M+H] <sup>+</sup> | Feruloyl syringic acid                        | Hydroxycinnamoyl derivatives | 14100    | 26800    | 28700    | 21300    | 18500    | 19700    | 9190     | 9        | 4780     | 8210     | 12400    | 14700    |

|         |          |         |       |      |           |                    |                                  |                              |         |          |         |          |          |          |          |          |         |          |          |          |
|---------|----------|---------|-------|------|-----------|--------------------|----------------------------------|------------------------------|---------|----------|---------|----------|----------|----------|----------|----------|---------|----------|----------|----------|
| Mul0185 | Positive | 183.058 | 137.1 | 3.28 | 182.0579  | [M+H] <sup>+</sup> | Homovanillic acid                | Hydroxycinnamoyl derivatives | 1120000 | 793000   | 1170000 | 127000   | 95700    | 107000   | 107000   | 80300    | 47800   | 486000   | 461000   | 465000   |
| Mul0265 | Positive | 151.068 | 105   | 5.17 | 150.068   | [M+H] <sup>+</sup> | Hydrocinnamic acid               | Hydroxycinnamoyl derivatives | 19400   | 26200    | 9       | 9        | 9        | 9        | 9        | 9        | 9       | 9840     | 9520     | 10100    |
| Mul0176 | Positive | 195.1   | 177.5 | 3.08 | 194.1     | [M+H] <sup>+</sup> | Hydroxy-methoxycinnamate         | Hydroxycinnamoyl derivatives | 84700   | 71500    | 55200   | 13300    | 8530     | 12700    | 27300    | 15900    | 20600   | 42500    | 44100    | 41000    |
| Mul0290 | Positive | 271     | 137.1 | 6.67 | 270.089   | [M+H] <sup>+</sup> | Medicarpin                       | Hydroxycinnamoyl derivatives | 4740    | 2780     | 14600   | 38800    | 17400    | 18100    | 22200    | 17400    | 18100   | 13800    | 14900    | 13700    |
| Mul0302 | Positive | 179     | 138   | 7.3  | 178.099   | [M+H] <sup>+</sup> | Methyleugenol                    | Hydroxycinnamoyl derivatives | 23600   | 21900    | 19600   | 9        | 9        | 9        | 9        | 9        | 9       | 8670     | 7750     | 6490     |
| Mul0454 | Negative | 665.1   | 323.4 | 2.19 | 666.1     | [M-H] <sup>-</sup> | O-Caffeoyl maltotriose           | Hydroxycinnamoyl derivatives | 30000   | 18000    | 24900   | 9        | 9        | 9        | 9        | 771      | 1820    | 12700    | 12100    | 13500    |
| Mul0245 | Positive | 149.1   | 131   | 4.25 | 148.052   | [M+H] <sup>+</sup> | p-Coumaraldehyde                 | Hydroxycinnamoyl derivatives | 159000  | 252000   | 18100   | 13500    | 21800    | 13100    | 13200    | 15100    | 43000   | 73400    | 71000    | 83400    |
| Mul0518 | Negative | 163.047 | 119   | 3.71 | 164.047   | [M-H] <sup>-</sup> | p-Coumaric acid                  | Hydroxycinnamoyl derivatives | 2640000 | 3110000  | 920000  | 488000   | 844000   | 548000   | 491000   | 439000   | 402000  | 1310000  | 1240000  | 1220000  |
| Mul0510 | Negative | 149     | 130.1 | 3.5  | 150.068   | [M-H] <sup>-</sup> | p-Coumaryl alcohol               | Hydroxycinnamoyl derivatives | 10100   | 9        | 4490    | 18600    | 22200    | 18300    | 9290     | 10500    | 9130    | 8840     | 9100     | 6430     |
| Mul0570 | Negative | 357.142 | 136.1 | 5.18 | 358.142   | [M-H] <sup>-</sup> | Pinoresinol                      | Hydroxycinnamoyl derivatives | 68400   | 31600    | 61700   | 50200    | 33800    | 44200    | 19100    | 15700    | 15600   | 38700    | 29400    | 35500    |
| Mul0562 | Negative | 227.079 | 143.1 | 4.59 | 228.0786  | [M-H] <sup>-</sup> | Resveratrol                      | Hydroxycinnamoyl derivatives | 82300   | 100000   | 52400   | 614000   | 330000   | 440000   | 22700    | 24000    | 33700   | 168000   | 161000   | 151000   |
| Mul0532 | Negative | 223.069 | 149.1 | 3.89 | 224.069   | [M-H] <sup>-</sup> | Sinapic acid                     | Hydroxycinnamoyl derivatives | 9       | 9        | 9       | 151000   | 172000   | 146000   | 9        | 26500    | 30900   | 49300    | 43500    | 48400    |
| Mul0557 | Negative | 207.1   | 177.1 | 4.43 | 208.074   | [M-H] <sup>-</sup> | Sinapinaldehyde                  | Hydroxycinnamoyl derivatives | 19900   | 20700    | 32700   | 173000   | 119000   | 143000   | 47300    | 56100    | 34800   | 67000    | 59300    | 60400    |
| Mul0522 | Negative | 209     | 179.1 | 3.73 | 210.089   | [M-H] <sup>-</sup> | Sinapyl alcohol                  | Hydroxycinnamoyl derivatives | 9       | 9        | 9       | 148000   | 126000   | 144000   | 9        | 9        | 9       | 34600    | 41900    | 28100    |
| Mul0539 | Negative | 181.1   | 151.1 | 3.99 | 182.1     | [M-H] <sup>-</sup> | Syringaldehyde                   | Hydroxycinnamoyl derivatives | 7780    | 8390     | 14900   | 12300    | 6250     | 15100    | 13800    | 7550     | 6210    | 9090     | 12600    | 11000    |
| Mul0482 | Negative | 371.1   | 209.2 | 2.8  | 372.142   | [M-H] <sup>-</sup> | Syringin                         | Hydroxycinnamoyl derivatives | 154000  | 146000   | 161000  | 183000   | 183000   | 173000   | 55600    | 127000   | 141000  | 155000   | 150000   | 132000   |
| Mul0278 | Positive | 133.058 | 115   | 5.83 | 132.0575  | [M+H] <sup>+</sup> | trans-cinnamaldehyde             | Hydroxycinnamoyl derivatives | 5670    | 6480     | 6790    | 11400    | 6950     | 15100    | 15200    | 12800    | 6630    | 9840     | 13400    | 8560     |
| Mul0502 | Negative | 167     | 152.1 | 3.26 | 168       | [M-H] <sup>-</sup> | Vanillic acid                    | Hydroxycinnamoyl derivatives | 29900   | 28400    | 39700   | 23100    | 19400    | 28000    | 25900    | 21300    | 82600   | 31900    | 34800    | 29900    |
| Mul0214 | Positive | 219.1   | 189.5 | 3.68 | 218.1     | [M+H] <sup>+</sup> | 5-Methoxy-N,N-dimethyltryptamine | Tryptamine derivatives       | 169000  | 145000   | 111000  | 132000   | 109000   | 122000   | 28200    | 30400    | 21600   | 86400    | 83800    | 85800    |
| Mul0156 | Positive | 161.1   | 144.2 | 2.75 | 160.1     | [M+H] <sup>+</sup> | L-Tryptamine                     | Tryptamine derivatives       | 77500   | 99600    | 227000  | 647000   | 338000   | 661000   | 60800    | 34900    | 36200   | 207000   | 193000   | 225000   |
| Mul0175 | Positive | 219     | 160.1 | 3.06 | 218.106   | [M+H] <sup>+</sup> | N-Acetyl-5-hydroxytryptamine     | Tryptamine derivatives       | 28100   | 21400    | 33400   | 37200    | 35200    | 33900    | 54300    | 69100    | 71200   | 53000    | 39300    | 31800    |
| Mul0216 | Positive | 485.1   | 147.5 | 3.68 | 484.1     | [M+H] <sup>+</sup> | N-hexosyl-p-coumaroyl serotonin  | Tryptamine derivatives       | 41500   | 35600    | 44500   | 8180     | 7890     | 4900     | 16700    | 14900    | 5740    | 53600    | 34100    | 54100    |
| Mul0103 | Positive | 177.2   | 160.5 | 1.44 | 176.2     | [M+H] <sup>+</sup> | N-hydroxy tryptamine             | Tryptamine derivatives       | 69300   | 26100    | 30200   | 490000   | 429000   | 742000   | 37300    | 106000   | 48700   | 113000   | 96300    | 109000   |
| Mul0110 | Positive | 177     | 160.2 | 1.66 | 176.095   | [M+H] <sup>+</sup> | serotonin                        | Tryptamine derivatives       | 5680000 | 7960000  | 6010000 | 22500000 | 20700000 | 24200000 | 49400000 | 10400000 | 9090000 | 12700000 | 12900000 | 13300000 |
| Mul0468 | Negative | 359.2   | 179.1 | 2.5  | 360.129   | [M-H] <sup>-</sup> | Aminophylline                    | Alkaloids                    | 17700   | 17300    | 18300   | 9        | 9        | 9        | 35500    | 32500    | 20800   | 16700    | 16800    | 11400    |
| Mul0058 | Positive | 118.1   | 118.1 | 0.81 | 117.079   | [M+H] <sup>+</sup> | Betaine                          | Alkaloids                    | 165000  | 435000   | 165000  | 84300    | 90900    | 57800    | 74000    | 62300    | 122000  | 97100    | 87700    | 137000   |
| Mul0513 | Negative | 433.121 | 433   | 3.6  | 434.121   | [M-H] <sup>-</sup> | Isohemiphloin                    | Alkaloids                    | 112000  | 64500    | 66400   | 20900    | 14900    | 16300    | 22400    | 22000    | 20500   | 53300    | 48900    | 43500    |
| Mul0074 | Positive | 86.1    | 56    | 1.17 | 85.1      | [M+H] <sup>+</sup> | Piperidine                       | Alkaloids                    | 304000  | 126000   | 588000  | 636000   | 773000   | 533000   | 1990000  | 1850000  | 1940000 | 1200000  | 1120000  | 1120000  |
| Mul0050 | Positive | 138     | 137.9 | 0.8  | 137.048   | [M+H] <sup>+</sup> | Trigonelline                     | Alkaloids                    | 6860000 | 11200000 | 8480000 | 6750000  | 6430000  | 7500000  | 3380000  | 2900000  | 2980000 | 4320000  | 5090000  | 5250000  |
| Mul0396 | Negative | 213.1   | 78.9  | 0.97 | 214.1     | [M-H] <sup>-</sup> | 2-Deoxyribose 1-phosphate        | Carbohydrates                | 75800   | 47400    | 28300   | 113000   | 198000   | 111000   | 732000   | 1010000  | 983000  | 428000   | 450000   | 435000   |
| Mul0387 | Negative | 177.14  | 70.8  | 0.82 | 178.048   | [M-H] <sup>-</sup> | D-(+)-Glucono-1,5-lactone        | Carbohydrates                | 167000  | 155000   | 69100   | 83100    | 97300    | 108000   | 28700    | 37800    | 36000   | 54000    | 71800    | 53400    |
| Mul0376 | Negative | 179     | 70.9  | 0.77 | 180.063   | [M-H] <sup>-</sup> | D(+)-Glucose                     | Carbohydrates                | 8170000 | 7860000  | 3430000 | 3210000  | 4750000  | 3730000  | 2310000  | 1900000  | 2080000 | 3320000  | 4100000  | 3340000  |
| Mul0035 | Positive | 505.169 | 127   | 0.77 | 504.169   | [M+H] <sup>+</sup> | D(+)-Melezitose                  | Carbohydrates                | 64300   | 49200    | 106000  | 54300    | 90100    | 74000    | 97800    | 73400    | 75300   | 60700    | 74500    | 66800    |
| Mul0372 | Negative | 649.1   | 503.3 | 0.77 | 650.1     | [M-H] <sup>-</sup> | D(+)-Melezitose O-rhamnoside     | Carbohydrates                | 37700   | 34000    | 63300   | 30000    | 64900    | 21100    | 120000   | 108000   | 161000  | 104000   | 72800    | 105000   |
| Mul0379 | Negative | 341     | 58.8  | 0.78 | 342.11621 | [M-H] <sup>-</sup> | D-(+)-Sucrose                    | Carbohydrates                | 7370000 | 5320000  | 7710000 | 4720000  | 4270000  | 5190000  | 7280000  | 9030000  | 7240000 | 8070000  | 5070000  | 5110000  |
| Mul0421 | Negative | 259     | 78.8  | 1.23 | 260.03    | [M-H] <sup>-</sup> | D-Fructose 6-phosphate           | Carbohydrates                | 242000  | 241000   | 263000  | 469000   | 688000   | 462000   | 1330000  | 1220000  | 1220000 | 845000   | 762000   | 746000   |
| Mul0384 | Negative | 193.141 | 72.9  | 0.8  | 194.043   | [M-H] <sup>-</sup> | D-glucuronic acid                | Carbohydrates                | 217000  | 224000   | 129000  | 446000   | 769000   | 430000   | 988000   | 1490000  | 1790000 | 887000   | 812000   | 907000   |
| Mul0398 | Negative | 259     | 96.9  | 0.99 | 260.03    | [M-H] <sup>-</sup> | D-Glucose 6-phosphate            | Carbohydrates                | 1000000 | 751000   | 1120000 | 5600000  | 5050000  | 4910000  | 5680000  | 4440000  | 4300000 | 4410000  | 4550000  | 4030000  |
| Mul0385 | Negative | 149     | 58.9  | 0.81 | 150.053   | [M-H] <sup>-</sup> | DL-Arabinose                     | Carbohydrates                | 1410000 | 1140000  | 976000  | 409000   | 475000   | 497000   | 243000   | 290000   | 269000  | 444000   | 451000   | 450000   |
| Mul0424 | Negative | 289     | 78.9  | 1.25 | 290.04    | [M-H] <sup>-</sup> | D-Sedoheptuose 7-phosphate       | Carbohydrates                | 99600   | 69900    | 42400   | 272000   | 1080000  | 9        | 155000   | 132000   | 144000  | 443000   | 262000   | 480000   |
| Mul0402 | Negative | 289.1   | 97    | 1.16 | 290.1     | [M-H] <sup>-</sup> | Glucarate O-Phosphoric acid      | Carbohydrates                | 235000  | 170000   | 79800   | 9        | 2850000  | 9        | 315000   | 192000   | 233000  | 713000   | 683000   | 749000   |
| Mul0004 | Positive | 197.058 | 153   | 0.59 | 196.0583  | [M+H] <sup>+</sup> | Gluconic acid                    | Carbohydrates                | 42700   | 115000   | 50400   | 27400    | 164000   | 39000    | 5120     | 4260     | 37800   | 57000    | 58500    | 59900    |
| Mul0007 | Positive | 180     | 84.2  | 0.61 | 179       | [M+H] <sup>+</sup> | Glucosamine                      | Carbohydrates                | 124000  | 571000   | 354000  | 334000   | 337000   | 337000   | 194000   | 188000   | 201000  | 205000   | 248000   | 354000   |
| Mul0395 | Negative | 163     | 70.8  | 0.85 | 164.069   | [M-H] <sup>-</sup> | L-Fucose                         | Carbohydrates                | 20000   | 17000    | 22600   | 14200    | 18600    | 17400    | 11000    | 19800    | 9       | 26900    | 19300    | 9340     |
| Mul0380 | Negative | 177.14  | 74.8  | 0.78 | 178.048   | [M-H] <sup>-</sup> | L-Gulonic-γ-lactone              | Carbohydrates                | 42200   | 54100    | 9       | 9        | 24000    | 9        | 9        | 13500    | 15600   | 16300    | 20400    | 26000    |
| Mul0373 | Negative | 665.1   | 485.3 | 0.77 | 666.1     | [M-H] <sup>-</sup> | Maltotetraose                    | Carbohydrates                | 15100   | 24200    | 18700   | 14200    | 18300    | 19700    | 19600    | 13900    | 20100   | 19200    | 15500    | 15400    |
| Mul0063 | Positive | 222     | 138.1 | 0.83 | 221.09    | [M+H] <sup>+</sup> | N-Acetyl-D-glucosamine           | Carbohydrates                | 87800   | 71300    | 74400   | 183000   | 179000   | 162000   | 59400    | 56400    | 52600   | 69000    | 78300    | 87000    |



|         |          |         |       |      |          |        |                                                 |                            |         |         |          |         |         |         |          |          |         |         |         |         |
|---------|----------|---------|-------|------|----------|--------|-------------------------------------------------|----------------------------|---------|---------|----------|---------|---------|---------|----------|----------|---------|---------|---------|---------|
| Mul0390 | Negative | 421.1   | 241.2 | 0.83 | 422.1    | [M-H]- | Trehalose 6-phosphate                           | Carbohydrates              | 60200   | 50300   | 80500    | 75300   | 87000   | 77000   | 76100    | 72500    | 81800   | 85700   | 93500   | 82300   |
| Mul0288 | Positive | 319.1   | 301.9 | 6.63 | 318.1    | [M+H]+ | Phytocassane C                                  | Terpenoids                 | 9       | 9       | 9        | 213000  | 50500   | 159000  | 9        | 9        | 9       | 23100   | 25000   | 24800   |
| Mul0321 | Positive | 301.2   | 133.1 | 8.15 | 300.209  | [M+H]+ | 4-Oxoretinol                                    | Vitamins                   | 2880    | 4560    | 9        | 8510    | 6740    | 6430    | 13200    | 3880     | 4270    | 5010    | 5720    | 6560    |
| Mul0358 | Positive | 287.2   | 173.2 | 11.2 | 286.23   | [M+H]+ | All-trans-13,14-dihydroretinol                  | Vitamins                   | 4410    | 1530    | 3610     | 5750    | 5010    | 6160    | 3620     | 4210     | 3530    | 4980    | 4190    | 4190    |
| Mul0183 | Positive | 245.09  | 227.1 | 3.21 | 244.088  | [M+H]+ | Biotin                                          | Vitamins                   | 65200   | 60200   | 89100    | 132000  | 119000  | 144000  | 444000   | 250000   | 631000  | 167000  | 205000  | 175000  |
| Mul0130 | Positive | 220.2   | 202.7 | 2.19 | 219.2    | [M+H]+ | D-Pantothenic acid                              | Vitamins                   | 8590000 | 7200000 | 11300000 | 8670000 | 8520000 | 9830000 | 12000000 | 10800000 | 9190000 | 9810000 | 9660000 | 9520000 |
| Mul0394 | Negative | 175     | 87    | 0.84 | 176.12   | [M-H]- | L-ascorbate                                     | Vitamins                   | 593000  | 388000  | 386000   | 348000  | 156000  | 323000  | 144000   | 136000   | 475000  | 184000  | 200000  | 186000  |
| Mul0104 | Positive | 123.1   | 80.3  | 1.47 | 122.1    | [M+H]+ | Niacinamide                                     | Vitamins                   | 50500   | 82100   | 61300    | 53400   | 33400   | 32100   | 63100    | 59100    | 45000   | 43500   | 45600   | 48100   |
| Mul0205 | Positive | 138.05  | 78    | 3.58 | 137.048  | [M+H]+ | Nicotinic Acid Methyl Ester (Methyl Nicotinate) | Vitamins                   | 9       | 7370    | 9        | 9       | 9       | 9       | 8850     | 10900    | 15800   | 7570    | 8430    | 9250    |
| Mul0422 | Negative | 155     | 111   | 1.24 | 156.017  | [M-H]- | Orotic acid                                     | Vitamins                   | 70800   | 44800   | 99000    | 9       | 9       | 9       | 419000   | 364000   | 247000  | 141000  | 161000  | 147000  |
| Mul0157 | Positive | 279.13  | 149.2 | 2.78 | 278.13   | [M+H]+ | Pantetheine                                     | Vitamins                   | 9       | 9       | 9        | 389000  | 655000  | 496000  | 9        | 9        | 9       | 207000  | 232000  | 208000  |
| Mul0091 | Positive | 170.1   | 134.1 | 1.22 | 169.074  | [M+H]+ | Pyridoxine                                      | Vitamins                   | 404000  | 689000  | 308000   | 328000  | 365000  | 354000  | 98000    | 79900    | 95800   | 285000  | 294000  | 307000  |
| Mul0096 | Positive | 250     | 134   | 1.25 | 249.04   | [M+H]+ | Pyridoxine 5'-phosphate                         | Vitamins                   | 9       | 3010    | 9        | 9       | 9       | 9       | 6290     | 4420     | 10100   | 4760    | 3110    | 6500    |
| Mul0102 | Positive | 494.1   | 332.8 | 1.39 | 493.1    | [M+H]+ | Pyridoxine di-O-hexoside                        | Vitamins                   | 10200   | 13100   | 11200    | 4560    | 5370    | 9       | 9        | 4480     | 4030    | 6680    | 6550    | 6640    |
| Mul0171 | Positive | 508.1   | 152.5 | 2.98 | 507.1    | [M+H]+ | Pyridoxine O-feruloyl hexoside                  | Vitamins                   | 9       | 9       | 9        | 28500   | 18300   | 25800   | 18700    | 14400    | 9510    | 11700   | 12600   | 9450    |
| Mul0076 | Positive | 332.1   | 314.7 | 1.18 | 331.1    | [M+H]+ | Pyridoxine O-glucoside                          | Vitamins                   | 1200000 | 1150000 | 1400000  | 686000  | 1110000 | 706000  | 873000   | 688000   | 460000  | 849000  | 939000  | 961000  |
| Mul0495 | Negative | 375     | 255.2 | 3.09 | 376.138  | [M-H]- | Riboflavin                                      | Vitamins                   | 42200   | 47900   | 57800    | 25900   | 32000   | 22200   | 41800    | 30300    | 37600   | 46400   | 40700   | 43100   |
| Mul0054 | Positive | 265.1   | 140.4 | 0.81 | 264.1    | [M+H]+ | Thiamine                                        | Vitamins                   | 13800   | 8670    | 13500    | 362000  | 227000  | 340000  | 12900    | 13200    | 8690    | 26200   | 28400   | 28900   |
| Mul0275 | Positive | 149.2   | 107   | 5.58 | 148.052  | [M+H]+ | 3,4-Dihydrocoumarin                             | Coumarins                  | 29400   | 38200   | 6470     | 9       | 9       | 9       | 9        | 9        | 8250    | 11400   | 13300   | 13400   |
| Mul0504 | Negative | 485.1   | 323.3 | 3.3  | 486.1    | [M-H]- | 4-hydroxycoumarin di-glucoside                  | Coumarins                  | 9       | 5010    | 9        | 5920    | 9       | 6790    | 6630     | 7240     | 6990    | 5140    | 6790    | 3600    |
| Mul0252 | Positive | 177.047 | 121   | 4.46 | 176.0473 | [M+H]+ | 4-Methylumbelliferone                           | Coumarins                  | 65000   | 50700   | 49200    | 97900   | 93100   | 78300   | 106000   | 108000   | 88700   | 88300   | 67500   | 71700   |
| Mul0154 | Positive | 353.1   | 272.8 | 2.73 | 352.1    | [M+H]+ | 6,7-dihydroxycoumarin 6-O-quinic acid           | Coumarins                  | 62400   | 142000  | 109000   | 60900   | 39500   | 49400   | 166000   | 128000   | 128000  | 86100   | 67900   | 95500   |
| Mul0461 | Negative | 351.1   | 132.6 | 2.41 | 352.1    | [M-H]- | 6,7-dihydroxycoumarin 7-O-quinic acid           | Coumarins                  | 972000  | 1470000 | 1280000  | 300000  | 280000  | 264000  | 1550000  | 1230000  | 1060000 | 962000  | 621000  | 787000  |
| Mul0242 | Positive | 177     | 121   | 4.15 | 176.047  | [M+H]+ | 6-Hydroxy-4-methylcoumarin                      | Coumarins                  | 39800   | 13300   | 22900    | 52700   | 52000   | 50800   | 61800    | 77700    | 62500   | 45000   | 37600   | 37700   |
| Mul0196 | Positive | 209.2   | 194.1 | 3.45 | 208.037  | [M+H]+ | 6-Methoxy-7,8-DihydroxyCoumarin                 | Coumarins                  | 146000  | 129000  | 195000   | 9       | 9       | 9       | 251000   | 256000   | 193000  | 124000  | 137000  | 107000  |
| Mul0190 | Positive | 179.03  | 179   | 3.35 | 178.027  | [M+H]+ | Daphnetin                                       | Coumarins                  | 29200   | 43000   | 13700    | 14700   | 32200   | 32500   | 30000    | 67900    | 71700   | 40800   | 38000   | 32100   |
| Mul0498 | Negative | 177     | 133.1 | 3.17 | 178.027  | [M-H]- | Esculetin (6,7-dihydroxycoumarin)               | Coumarins                  | 132000  | 154000  | 83300    | 94100   | 147000  | 98900   | 132000   | 252000   | 215000  | 153000  | 144000  | 132000  |
| Mul0462 | Negative | 703.4   | 351.3 | 2.42 | 704.4    | [M-H]- | Esculetin O-quinacyl esculetin O-quinic acid    | Coumarins                  | 22100   | 63100   | 34100    | 2590    | 9       | 4400    | 67200    | 50700    | 45000   | 23400   | 13100   | 13300   |
| Mul0149 | Positive | 341     | 179.1 | 2.58 | 340.079  | [M+H]+ | Esculin (6,7-Dihydroxycoumarin-6-glucoside)     | Coumarins                  | 1450000 | 1630000 | 3300000  | 409000  | 318000  | 450000  | 5740000  | 3880000  | 4290000 | 917000  | 954000  | 924000  |
| Mul0234 | Positive | 193.1   | 178.1 | 4    | 192.042  | [M+H]+ | Scopoletin (7-Hydroxy-5-methoxycoumarin)        | Coumarins                  | 160000  | 79100   | 92900    | 82000   | 76400   | 76300   | 235000   | 265000   | 223000  | 145000  | 127000  | 128000  |
| Mul0047 | Positive | 256.2   | 124   | 0.8  | 255.2    | [M+H]+ | Nicotinate ribonucleoside                       | Nicotinic acid derivatives | 8370000 | 8690000 | 4880000  | 4820000 | 5460000 | 5100000 | 3340000  | 3180000  | 3260000 | 4570000 | 4590000 | 4620000 |
| Mul0409 | Negative | 122     | 77.9  | 1.19 | 123      | [M-H]- | Nicotinic acid                                  | Nicotinic acid derivatives | 224000  | 170000  | 82800    | 9       | 97200   | 25100   | 404000   | 378000   | 420000  | 194000  | 200000  | 191000  |
| Mul0118 | Positive | 286     | 124.3 | 1.9  | 285      | [M+H]+ | Nicotinic acid-hexoside                         | Nicotinic acid derivatives | 30600   | 28400   | 30600    | 19600   | 28700   | 23400   | 70200    | 92900    | 95200   | 58800   | 45700   | 50000   |
| Mul0552 | Negative | 269     | 225   | 4.37 | 270.053  | [M-H]- | 2'-Hydroxydaidzein                              | Isoflavone                 | 4840    | 5290    | 4040     | 9       | 9       | 9       | 10500    | 13300    | 14500   | 7260    | 6320    | 7280    |
| Mul0258 | Positive | 287     | 217.1 | 4.79 | 286.048  | [M+H]+ | 2'-Hydroxygenistein                             | Isoflavone                 | 1790000 | 1960000 | 4500000  | 248000  | 516000  | 280000  | 163000   | 123000   | 1210000 | 1110000 | 1140000 | 1160000 |
| Mul0247 | Positive | 271     | 215.2 | 4.32 | 270.053  | [M+H]+ | 6-Hydroxydaidzein                               | Isoflavone                 | 12300   | 14900   | 9        | 6710    | 8270    | 5270    | 3730     | 5060     | 3510    | 6580    | 10900   | 4630    |
| Mul0296 | Positive | 285     | 270.2 | 7    | 284.069  | [M+H]+ | Biochanin A                                     | Isoflavone                 | 13200   | 6800    | 76000    | 9       | 9       | 9       | 9        | 9        | 9       | 10000   | 9050    | 12300   |
| Mul0257 | Positive | 255.058 | 199.1 | 4.75 | 254.0579 | [M+H]+ | Daidzein                                        | Isoflavone                 | 9       | 8930    | 16800    | 5730    | 9       | 4060    | 12900    | 13600    | 18500   | 8860    | 8410    | 7840    |
| Mul0254 | Positive | 431.13  | 267.7 | 4.54 | 430.126  | [M+H]+ | Formononetin 7-O-glucoside (Ononin)             | Isoflavone                 | 9       | 9       | 9        | 6760    | 6010    | 6660    | 19000    | 14600    | 19600   | 7920    | 11000   | 10100   |
| Mul0226 | Positive | 433     | 270.9 | 3.84 | 432.106  | [M+H]+ | Genistein 7-O-Glucoside (Genistin)              | Isoflavone                 | 79600   | 68400   | 164000   | 9       | 9       | 9       | 241000   | 240000   | 326000  | 116000  | 133000  | 114000  |
| Mul0564 | Negative | 285.048 | 257.1 | 4.83 | 286.048  | [M-H]- | Orobol (5,7,3',4'-tetrahydroxyisoflavone)       | Isoflavone                 | 8930    | 10500   | 14100    | 160000  | 130000  | 93500   | 4640     | 9360     | 15700   | 70900   | 50900   | 72300   |
| Mul0168 | Positive | 192.06  | 114.9 | 2.95 | 191.058  | [M+H]+ | 5-Hydroxyindole-3-acetic acid                   | Indole derivatives         | 11300   | 9130    | 10700    | 9790    | 8550    | 12500   | 9        | 9970     | 3160    | 12500   | 9110    | 9080    |
| Mul0144 | Positive | 118     | 58.2  | 2.41 | 117      | [M+H]+ | Indole                                          | Indole derivatives         | 18800   | 10200   | 48900    | 30500   | 34900   | 20500   | 136000   | 98800    | 114000  | 32200   | 46800   | 53500   |
| Mul0249 | Positive | 146.1   | 118.1 | 4.36 | 145.053  | [M+H]+ | Indole-3-carboxaldehyde                         | Indole derivatives         | 23800   | 27500   | 45300    | 35700   | 32400   | 34800   | 76900    | 37900    | 40900   | 33700   | 39100   | 36200   |
| Mul0543 | Negative | 160.05  | 116   | 4.07 | 161.0477 | [M-H]- | Indole-5-carboxylic acid                        | Indole derivatives         | 38000   | 25100   | 32500    | 28000   | 26400   | 31800   | 67400    | 32100    | 51300   | 42900   | 40400   | 39300   |
| Mul0139 | Positive | 206.1   | 147.5 | 2.39 | 205.1    | [M+H]+ | Methoxyindoleacetic acid                        | Indole derivatives         | 207000  | 76000   | 502000   | 405000  | 417000  | 359000  | 1920000  | 1680000  | 1500000 | 730000  | 683000  | 716000  |
| Mul0428 | Negative | 147.07  | 58.8  | 1.36 | 148.074  | [M-H]- | (Rs)-Mevalonic acid                             | Organic acids              | 70800   | 71600   | 9        | 9       | 215000  | 9       | 759000   | 784000   | 1120000 | 428000  | 401000  | 338000  |
| Mul0509 | Negative | 131.08  | 68.9  | 3.45 | 132.079  | [M-H]- | (S)-(-)-2-Hydroxyisocaproic acid                | Organic acids              | 57000   | 40600   | 34100    | 23900   | 32000   | 44800   | 53100    | 49400    | 124000  | 62100   | 48400   | 39800   |
| Mul0523 | Negative | 164.04  | 92    | 3.76 | 165.043  | [M-H]- | 2-(Formylamino)benzoic acid                     | Organic acids              | 256000  | 329000  | 91800    | 62600   | 77500   | 64000   | 69400    | 44300    | 49400   | 147000  | 125000  | 125000  |
| Mul0486 | Negative | 153.2   | 109   | 2.88 | 154.027  | [M-H]- | 2,3-Dihydroxybenzoic acid                       | Organic acids              | 215000  | 169000  | 146000   | 569000  | 552000  | 518000  | 217000   | 229000   | 245000  | 838000  | 499000  | 489000  |
| Mul0365 | Negative | 124     | 79.7  | 0.75 | 125.015  | [M-H]- | 2-Aminoethanesulfonic acid                      | Organic acids              | 4920    | 4860    | 5950     | 10100   | 11700   | 11400   | 5290     | 5600     | 7770    | 9800    | 7410    | 9870    |
| Mul0480 | Negative | 175.1   | 131.3 | 2.73 | 176.1    | [M-H]- | 2-Isopropylmalate                               | Organic acids              | 3460000 | 2280000 | 3310000  | 3500000 | 4190000 | 3590000 | 7940000  | 8450000  | 8450000 | 5630000 | 4970000 | 4670000 |
| Mul0474 | Negative | 145.06  | 101.1 | 2.58 | 146.058  | [M-H]- | 2-Methylglutaric acid                           | Organic acids              | 437000  | 310000  | 395000   | 210000  | 220000  | 228000  | 576000   | 577000   | 532000  | 341000  | 316000  | 301000  |
| Mul0450 | Negative | 131.042 | 86.9  | 2.15 | 132.0423 | [M-H]- | 2-Methylsuccinic acid                           | Organic acids              | 2880000 | 2220000 | 2270000  | 2650000 | 2120000 | 2550000 | 3940000  | 4210000  | 4310000 | 3100000 | 2880000 | 2920000 |
| Mul0088 | Positive | 124.03  | 77.8  | 1.21 | 123.032  | [M+H]+ | 2-Picolinic acid                                | Organic acids              | 29200   | 51100   | 18600    | 14100   | 28500   | 24900   | 22800    | 24000    | 27300   | 29900   | 17100   | 25700   |





Supplementary Table S2. Differentially accumulated metabolites between CS and HG2.

| Index   | log2_FC(case_mean/control_mean) | Pvalue   | fdr      | vip      | Ion mode | Q1 (Da) | Q3 (Da) | Rt (min) | Molecular Weight (Da) | Ionization model | Compounds                                       | Class                          |
|---------|---------------------------------|----------|----------|----------|----------|---------|---------|----------|-----------------------|------------------|-------------------------------------------------|--------------------------------|
| Mul0541 | 2.027337085                     | 0.001034 | 0.006145 | 1.001731 | Negative | 433.121 | 122.9   | 4.05     | 434.1213              | [M-H]-           | Naringenin 7-O-glucoside (Prunin)               | Flavanone                      |
| Mul0113 | -2.398989558                    | 0.001985 | 0.00935  | 1.012965 | Positive | 285.1   | 153.1   | 1.74     | 284.076               | [M+H]+           | Xanthosine                                      | Nucleotide and its derivatives |
| Mul0048 | -2.355145872                    | 0.016715 | 0.042795 | 1.02527  | Positive | 258.2   | 125.2   | 0.8      | 258.2                 | Protonated       | sn-Glycero-3-phosphocholine                     | Cholines                       |
| Mul0331 | -1.06788631                     | 0.006553 | 0.021504 | 1.027456 | Positive | 496.33  | 478.3   | 8.49     | 495.33                | [M+H]+           | LysoPC 16:0 (2n isomer)                         | Lipids_Glycerophospholipids    |
| Mul0121 | -0.508865055                    | 0.014593 | 0.038356 | 1.163724 | Positive | 166     | 120.1   | 1.96     | 165.079               | [M+H]+           | L-Phenylalanine                                 | Amino acids                    |
| Mul0432 | -3.243661038                    | 0.006634 | 0.02155  | 1.257786 | Negative | 282.092 | 150.1   | 1.44     | 283.092               | [M-H]-           | Guanosine                                       | Nucleotide and its derivatives |
| Mul0077 | 10.56313869                     | 0.00054  | 0.004168 | 1.406658 | Positive | 308     | 162     | 1.18     | 307.084               | [M+H]+           | Glutathione reduced form                        | Amino acid derivatives         |
| Mul0508 | 0.49386719                      | 0.00333  | 0.012761 | 1.435059 | Negative | 337.1   | 190.9   | 3.44     | 338.1                 | [M-H]-           | 3-O-p-Coumaroyl quinic acid                     | Quinate and its derivatives    |
| Mul0467 | -9.595809975                    | 0.000638 | 0.004615 | 1.502298 | Negative | 771.1   | 609.5   | 2.47     | 772.1                 | [M-H]-           | Luteolin O-hexosyl-O-hexosyl-O-hexoside         | Flavone                        |
| Mul0501 | 1.539264337                     | 0.008486 | 0.02585  | 1.514385 | Negative | 449.1   | 329.3   | 3.21     | 450.1                 | [M-H]-           | Eriodictyol C-hexoside                          | Flavone C-glycosides           |
| Mul0200 | -3.266886731                    | 0.002752 | 0.011118 | 1.547779 | Positive | 558.282 | 264.8   | 3.5      | 557.282               | [M+H]+           | N', N''-disinapoylspermidine                    | Phenolamides                   |
| Mul0511 | -3.658848904                    | 0.009483 | 0.028137 | 1.575244 | Negative | 121.04  | 91.9    | 3.58     | 122.037               | [M-H]-           | 4-Hydroxybenzaldehyde                           | Benzoic acid derivatives       |
| Mul0398 | 2.438216825                     | 5.79E-05 | 0.001186 | 1.670083 | Negative | 259     | 96.9    | 0.99     | 260.03                | [M-H]-           | D-Glucose 6-phosphate                           | Carbohydrates                  |
| Mul0445 | -18.89805373                    | 0.001273 | 0.007201 | 1.681785 | Negative | 355.1   | 181.2   | 1.97     | 356.1                 | [M-H]-           | Homovanilloyl quinic acid                       | Quinate and its derivatives    |
| Mul0212 | 18.92728757                     | 5.25E-05 | 0.001114 | 1.720114 | Positive | 611.2   | 299.8   | 3.67     | 610.2                 | [M+H]+           | Luteolin 8-C-hexosyl-O-hexoside                 | Flavone C-glycosides           |
| Mul0418 | -19.00957108                    | 3.98E-05 | 0.000946 | 1.771973 | Negative | 133     | 70.8    | 1.23     | 134.022               | [M-H]-           | L(-)-Malic acid                                 | Organic acids                  |
| Mul0529 | -5.180373951                    | 0.000963 | 0.005779 | 1.803986 | Negative | 505.1   | 301.2   | 3.87     | 506.1                 | [M-H]-           | Quercetin O-acetylhexoside                      | Flavonol                       |
| Mul0039 | -1.227209438                    | 0.006393 | 0.021097 | 1.818014 | Positive | 104.1   | 60.2    | 0.78     | 103.1                 | [M+H]+           | Choline                                         | Cholines                       |
| Mul0427 | -2.282147941                    | 0.02086  | 0.050782 | 1.855011 | Negative | 117.03  | 99.9    | 1.31     | 118.027               | [M-H]-           | Succinic acid                                   | Organic acids                  |
| Mul0456 | -0.272291303                    | 0.048768 | 0.097209 | 1.894683 | Negative | 353.1   | 191.1   | 2.21     | 354.095               | [M-H]-           | 1-O-Caffeoyl quinic acid                        | Quinate and its derivatives    |
| Mul0477 | -5.505257523                    | 1.21E-05 | 0.000513 | 1.901403 | Negative | 341     | 179.1   | 2.62     | 342.132               | [M-H]-           | Coniferin                                       | Hydroxycinnamoyl derivatives   |
| Mul0546 | 19.39933109                     | 0.000186 | 0.002245 | 2.020545 | Negative | 609.2   | 301.3   | 4.09     | 610.19                | [M-H]-           | Hesperetin 7-O-neohesperidoside (Neohesperidin) | Flavanone                      |
| Mul0269 | -1.899748526                    | 0.009051 | 0.027154 | 2.05525  | Positive | 273.1   | 137.1   | 5.3      | 272.069               | [M+H]+           | Butein                                          | Flavanone                      |
| Mul0356 | 1.287980763                     | 0.034145 | 0.073221 | 2.099873 | Positive | 355.1   | 337.9   | 10.36    | 354.1                 | [M+H]+           | MAG (18:2)                                      | Lipids_Glycerolipids           |
| Mul0120 | 0.876953311                     | 0.000924 | 0.0056   | 2.135517 | Positive | 167.1   | 121     | 1.95     | 166.1                 | [M+H]+           | 6-Methylmercaptapurine                          | Nucleotide and its derivatives |
| Mul0260 | 2.899799198                     | 0.01403  | 0.037039 | 2.15444  | Positive | 289.063 | 153.1   | 4.85     | 288.063               | [M+H]+           | Eriodictyol                                     | Flavanone                      |
| Mul0588 | 1.098883608                     | 0.018616 | 0.045882 | 2.223973 | Negative | 452     | 255.3   | 8.57     | 453                   | [M-H]-           | LysoPE 16:0                                     | Lipids_Glycerophospholipids    |
| Mul0287 | 5.69939239                      | 0.040924 | 0.084996 | 2.228317 | Positive | 318.3   | 300.9   | 6.63     | 317.3                 | [M+H]+           | 4-Hydroxysphinganine                            | Lipids_Fatty acids             |
| Mul0173 | 19.69395676                     | 0.000205 | 0.002245 | 2.237187 | Positive | 463.123 | 301.4   | 3        | 463.123               | Protonated       | Peonidin O-hexoside                             | Anthocyanins                   |
| Mul0135 | -19.7232669                     | 0.001073 | 0.006308 | 2.243324 | Positive | 465.1   | 303.1   | 2.3      | 465.1                 | Protonated       | Delphinidin 3-O-glucoside (Mirtillin)           | Anthocyanins                   |
| Mul0094 | -1.812711101                    | 0.012839 | 0.034809 | 2.289364 | Positive | 130     | 83.9    | 1.24     | 129.043               | [M+H]+           | 5-oxoproline                                    | Amino acid derivatives         |
| Mul0097 | 0.762549204                     | 0.041176 | 0.085222 | 2.820262 | Positive | 132.1   | 86      | 1.27     | 131.0946              | [M+H]+           | L-Leucine                                       | Amino acids                    |
| Mul0434 | 1.500853831                     | 0.003003 | 0.011811 | 2.895807 | Negative | 117.02  | 100     | 1.55     | 118.0266              | [M-H]-           | Methylmalonic acid                              | Organic acids                  |
| Mul0140 | 20.50903097                     | 0.005223 | 0.018313 | 2.89635  | Positive | 611.2   | 611.1   | 2.39     | 610.2                 | [M+H]+           | Gallocatechin-gallocatechin                     | Catechin derivatives           |
| Mul0084 | -4.043480702                    | 0.000267 | 0.002597 | 3.037874 | Positive | 136.1   | 136.1   | 1.21     | 135.0545              | [M+H]+           | Adenine                                         | Nucleotide and its derivatives |
| Mul0152 | -2.950623206                    | 0.000783 | 0.005129 | 3.050458 | Positive | 627.1   | 430     | 2.65     | 626.1                 | [M+H]+           | 8-C-hexosyl-hesperetin O-hexoside               | Flavone C-glycosides           |
| Mul0239 | 0.976742725                     | 0.000837 | 0.005254 | 3.133984 | Positive | 465     | 302.9   | 4.04     | 464.096               | [M+H]+           | Quercetin 4'-O-glucoside (Spiraeoside)          | Flavonol                       |
| Mul0444 | -4.862336215                    | 0.002409 | 0.010282 | 3.16846  | Negative | 299.1   | 137.2   | 1.96     | 300.1                 | [M-H]-           | Salicylic acid O-glucoside                      | Phytohormones                  |
| Mul0110 | 1.778219279                     | 0.00021  | 0.002245 | 3.231089 | Positive | 177     | 160.2   | 1.66     | 176.095               | [M+H]+           | serotonin                                       | Tryptamine derivatives         |
| Mul0315 | -3.829398985                    | 0.002019 | 0.009367 | 3.303221 | Positive | 494.3   | 184.6   | 7.71     | 493.3                 | [M+H]+           | LysoPC 16:1 (2n isomer)                         | Lipids_Glycerophospholipids    |
| Mul0217 | 20.82629653                     | 2.61E-05 | 0.000815 | 3.324847 | Positive | 595.159 | 287     | 3.7      | 594.159               | [M+H]+           | Kaempferol 3-O-robinobioside (Biorobin)         | Flavonol                       |
| Mul0043 | -3.07098746                     | 0.000203 | 0.002245 | 3.337993 | Positive | 116.1   | 70      | 0.79     | 115.0633              | [M+H]+           | L-Proline                                       | Amino acids                    |
| Mul0233 | 20.93956136                     | 3.21E-05 | 0.000929 | 3.458859 | Positive | 611.19  | 303     | 3.99     | 610.19                | [M+H]+           | Hesperetin 7-rutinoside (Hesperidin)            | Flavanone                      |
| Mul0524 | 21.4321818                      | 1.43E-05 | 0.000532 | 4.10533  | Negative | 593.159 | 285.1   | 3.77     | 594.1585              | [M-H]-           | Kaempferol 3-O-rutinoside (Nicotiflorin)        | Flavonol                       |
| Mul0150 | 5.299932504                     | 1.71E-06 | 0.00023  | 4.29001  | Positive | 595     | 287.9   | 2.6      | 595                   | Protonated       | Cyanidin 3-O-rutinoside (Keracyanin)            | Anthocyanins                   |
| Mul0531 | 1.837915752                     | 3.77E-06 | 0.00032  | 4.568975 | Negative | 463.132 | 301.1   | 3.88     | 464.132               | [M-H]-           | Hesperetin 5-O-glucoside                        | Flavanone                      |
| Mul0516 | 1.897430266                     | 5.15E-06 | 0.000383 | 4.635996 | Negative | 463     | 301.1   | 3.68     | 464.096               | [M-H]-           | Quercetin 3-O-glucoside (Isotrifoliin)          | Flavonol                       |
| Mul0544 | -6.951442914                    | 0.000477 | 0.003778 | 4.702795 | Negative | 137     | 92.8    | 4.07     | 138.032               | [M-H]-           | Quercetin 3-O-glucoside (Isotrifoliin)          | Phytohormones                  |
| Mul0145 | 21.87156126                     | 1.85E-05 | 0.000611 | 4.778036 | Positive | 449.1   | 287.3   | 2.45     | 449.1                 | Protonated       | Cyanidin 3-O-glucoside (Kuromanin)              | Anthocyanins                   |
| Mul0219 | 21.88955193                     | 9.86E-06 | 0.000513 | 4.811314 | Positive | 611.2   | 303.7   | 3.73     | 610.2                 | [M+H]+           | Quercetin 7-O-rutinoside                        | Flavonol                       |
| Mul0201 | 21.91139069                     | 7.71E-05 | 0.001275 | 4.835073 | Positive | 611.153 | 303     | 3.51     | 610.153               | [M+H]+           | Quercetin 3-O-rutinoside (Rutin)                | Flavonol                       |
| Mul0413 | 1.402098444                     | 0.02159  | 0.051711 | 5.435027 | Negative | 191     | 85      | 1.22     | 192.063               | [M-H]-           | Quinic acid                                     | Quinate and its derivatives    |
| Mul0460 | 23.69040866                     | 0.001307 | 0.007255 | 8.860092 | Negative | 465.1   | 285.3   | 2.41     | 466.1                 | [M-H]-           | Cyanidin O-syringic acid                        | Anthocyanins                   |



Supplementary Table S3. Differentially accumulated metabolites between CS and BYW.

| Index   | log2_FC(case_mean/control_mean) | Pvalue   | fdr      | vip      | Ion mode | Q1 (Da) | Q3 (Da) | Rt (min) | Molecular Weight (Da) | Ionization model   | Compounds                                                 | Class                          |
|---------|---------------------------------|----------|----------|----------|----------|---------|---------|----------|-----------------------|--------------------|-----------------------------------------------------------|--------------------------------|
| Mul0097 | 1.124666                        | 0.00649  | 0.023086 | 4.318728 | Positive | 132.1   | 86      | 1.27     | 131.0946              | [M+H] <sup>+</sup> | L-Leucine                                                 | Amino acids                    |
| Mul0092 | 1.117448                        | 0.007765 | 0.02539  | 4.263655 | Positive | 132     | 85.9    | 1.23     | 131.0946              | [M+H] <sup>+</sup> | L-Isoleucine                                              | Amino acids                    |
| Mul0056 | 2.158148                        | 0.000681 | 0.00586  | 3.360313 | Positive | 118.1   | 71.8    | 0.81     | 117.079               | [M+H] <sup>+</sup> | L-Valine                                                  | Amino acids                    |
| Mul0064 | 2.08429                         | 0.000845 | 0.006692 | 3.209017 | Positive | 118     | 88      | 0.85     | 117.079               | [M+H] <sup>+</sup> | DL-Norvaline                                              | Amino acids                    |
| Mul0374 | 2.668951                        | 0.000403 | 0.004583 | 1.989719 | Negative | 132     | 99.9    | 0.77     | 133.0375              | [M-H] <sup>-</sup> | L-Aspartic acid                                           | Amino acids                    |
| Mul0367 | 0.915354                        | 0.041563 | 0.079897 | 1.96791  | Negative | 131.054 | 71.8    | 0.75     | 132.054               | [M-H] <sup>-</sup> | L-Asparagine                                              | Amino acids                    |
| Mul0078 | 3.112818                        | 0.00051  | 0.005029 | 1.950255 | Positive | 150     | 72.8    | 1.18     | 149.051               | [M+H] <sup>+</sup> | L-Methionine                                              | Amino acids                    |
| Mul0375 | -0.94945                        | 0.042971 | 0.081138 | 1.91341  | Negative | 146.1   | 102.1   | 0.77     | 147.0532              | [M-H] <sup>-</sup> | L-Glutamic acid                                           | Amino acids                    |
| Mul0121 | -0.87122                        | 0.003195 | 0.015183 | 1.644755 | Positive | 166     | 120.1   | 1.96     | 165.079               | [M+H] <sup>+</sup> | L-Phenylalanine                                           | Amino acids                    |
| Mul0412 | 4.78118                         | 4.59E-06 | 0.000545 | 1.027776 | Negative | 180.1   | 163     | 1.21     | 181.074               | [M-H] <sup>-</sup> | L-(-)-Tyrosine                                            | Amino acids                    |
| Mul0094 | 1.006717                        | 0.006662 | 0.023361 | 3.049811 | Positive | 130     | 83.9    | 1.24     | 129.043               | [M+H] <sup>+</sup> | 5-oxoproline                                              | Amino acid derivatives         |
| Mul0443 | -2.09068                        | 0.022487 | 0.050981 | 2.817771 | Negative | 315.1   | 152.1   | 1.93     | 316.1                 | [M-H] <sup>-</sup> | 2,5-dihydroxy benzoic acid O-hexside                      | Benzoic acid derivatives       |
| Mul0511 | -3.64115                        | 0.009503 | 0.029145 | 1.75573  | Negative | 121.04  | 91.9    | 3.58     | 122.037               | [M-H] <sup>-</sup> | 4-Hydroxybenzaldehyde                                     | Benzoic acid derivatives       |
| Mul0048 | -2.64714                        | 0.01332  | 0.036128 | 1.175339 | Positive | 258.2   | 125.2   | 0.8      | 258.2                 | Protonated         | sn-Glycero-3-phosphocholine                               | Cholines                       |
| Mul0471 | 1.691029                        | 0.00176  | 0.011487 | 1.115058 | Negative | 315.1   | 153.2   | 2.55     | 316.1                 | [M-H] <sup>-</sup> | Protocatechuic acid O-glucoside                           | Catechin derivatives           |
| Mul0200 | -4.05889                        | 0.00224  | 0.013176 | 1.764355 | Positive | 558.282 | 264.8   | 3.5      | 557.282               | [M+H] <sup>+</sup> | N', N''-disinapoylspermidine                              | Phenolamides                   |
| Mul0001 | -0.47896                        | 0.047683 | 0.086882 | 1.519562 | Positive | 203     | 112     | 0.54     | 202                   | [M+H] <sup>+</sup> | Spermine                                                  | Phenolamides                   |
| Mul0120 | 1.597067                        | 3.10E-05 | 0.002292 | 3.735124 | Positive | 167.1   | 121     | 1.95     | 166.1                 | [M+H] <sup>+</sup> | 6-Methylmercaptapurine                                    | Nucleotide and its derivatives |
| Mul0084 | -1.7892                         | 0.000868 | 0.006781 | 2.904392 | Positive | 136.1   | 136.1   | 1.21     | 135.0545              | [M+H] <sup>+</sup> | Adenine                                                   | Nucleotide and its derivatives |
| Mul0117 | -0.21882                        | 0.003038 | 0.014654 | 1.638581 | Positive | 268.097 | 136.1   | 1.89     | 267.097               | [M+H] <sup>+</sup> | Adenosine                                                 | Nucleotide and its derivatives |
| Mul0051 | -2.76812                        | 0.041785 | 0.080066 | 1.616941 | Positive | 244.086 | 111.4   | 0.8      | 243.086               | [M+H] <sup>+</sup> | Cytidine                                                  | Nucleotide and its derivatives |
| Mul0404 | 2.915608                        | 0.002827 | 0.014412 | 1.365623 | Negative | 565.1   | 323.3   | 1.18     | 566.1                 | [M-H] <sup>-</sup> | Uridine 5'-diphospho-D-glucose                            | Nucleotide and its derivatives |
| Mul0432 | -1.68863                        | 0.015947 | 0.040483 | 1.199821 | Negative | 282.092 | 150.1   | 1.44     | 283.092               | [M-H] <sup>-</sup> | Guanosine                                                 | Nucleotide and its derivatives |
| Mul0155 | 1.919365                        | 0.010725 | 0.031437 | 1.153718 | Positive | 298     | 135.1   | 2.73     | 297.09                | [M+H] <sup>+</sup> | 5'-Deoxy-5'-(methylthio)adenosine                         | Nucleotide and its derivatives |
| Mul0113 | -1.60372                        | 0.003963 | 0.017438 | 1.015391 | Positive | 285.1   | 153.1   | 1.74     | 284.076               | [M+H] <sup>+</sup> | Xanthosine                                                | Nucleotide and its derivatives |
| Mul0150 | 4.611689                        | 0.001607 | 0.010723 | 3.691561 | Positive | 595     | 287.9   | 2.6      | 595                   | Protonated         | Cyanidin 3-O-rutinoside (Keracyanin)                      | Anthocyanins                   |
| Mul0135 | -5.82237                        | 0.001149 | 0.00822  | 2.472055 | Positive | 465.1   | 303.1   | 2.3      | 465.1                 | Protonated         | Delphinidin 3-O-glucoside (Mirtillin)                     | Anthocyanins                   |
| Mul0460 | 19.34018                        | 0.003059 | 0.014654 | 2.170691 | Negative | 465.1   | 285.3   | 2.41     | 466.1                 | [M-H] <sup>-</sup> | Cyanidin O-syringic acid                                  | Anthocyanins                   |
| Mul0148 | 18.41852                        | 0.016506 | 0.04093  | 1.515909 | Positive | 433.1   | 271     | 2.58     | 433.1                 | Protonated         | Pelargonidin 3-O-beta-D-glucoside (Callistephin chloride) | Anthocyanins                   |
| Mul0467 | -6.42483                        | 0.000665 | 0.005812 | 1.661539 | Negative | 771.1   | 609.5   | 2.47     | 772.1                 | [M-H] <sup>-</sup> | Luteolin O-hexosyl-O-hexosyl-O-hexoside                   | Flavone                        |
| Mul0530 | 2.980343                        | 2.90E-06 | 0.000441 | 1.403585 | Negative | 503.1   | 341.3   | 3.88     | 504.1                 | [M-H] <sup>-</sup> | Chrysoeriol O-acetylhexoside                              | Flavone                        |
| Mul0515 | -1.98656                        | 0.004594 | 0.01903  | 1.142585 | Negative | 521.1   | 329.3   | 3.68     | 522.1                 | [M-H] <sup>-</sup> | Tricin O-saccharic acid                                   | Flavone                        |
| Mul0221 | -17.1767                        | 0.003556 | 0.015933 | 1.020276 | Positive | 449     | 287.1   | 3.76     | 448                   | [M+H] <sup>+</sup> | Luteolin 7-O-glucoside                                    | Flavone                        |
| Mul0201 | 21.36255                        | 8.98E-05 | 0.002424 | 4.459434 | Positive | 611.153 | 303     | 3.51     | 610.153               | [M+H] <sup>+</sup> | Quercetin 3-O-rutinoside (Rutin)                          | Flavonol                       |
| Mul0219 | 21.26202                        | 2.97E-06 | 0.000441 | 4.306888 | Positive | 611.2   | 303.7   | 3.73     | 610.2                 | [M+H] <sup>+</sup> | Quercetin 7-O-rutinoside                                  | Flavonol                       |
| Mul0529 | 2.331194                        | 0.001979 | 0.012244 | 4.083021 | Negative | 505.1   | 301.2   | 3.87     | 506.1                 | [M-H] <sup>-</sup> | Quercetin O-acetylhexoside                                | Flavonol                       |
| Mul0516 | 0.935962                        | 0.010116 | 0.030348 | 2.886952 | Negative | 463     | 301.1   | 3.68     | 464.096               | [M-H] <sup>-</sup> | Quercetin 3-O-glucoside (Isotrofolin)                     | Flavonol                       |
| Mul0239 | 0.612385                        | 0.012174 | 0.034436 | 2.494541 | Positive | 465     | 302.9   | 4.04     | 464.096               | [M+H] <sup>+</sup> | Quercetin 4'-O-glucoside (Spiraeoside)                    | Flavonol                       |
| Mul0524 | 18.60429                        | 0.000462 | 0.004726 | 1.710056 | Negative | 593.159 | 285.1   | 3.77     | 594.1585              | [M-H] <sup>-</sup> | Kaempferol 3-O-rutinoside (Nicotiflorin)                  | Flavonol                       |
| Mul0217 | 18.52576                        | 0.003351 | 0.01543  | 1.648366 | Positive | 595.159 | 287     | 3.7      | 594.159               | [M+H] <sup>+</sup> | Kaempferol 3-O-robinobioside (Biorobin)                   | Flavonol                       |
| Mul0162 | 2.099913                        | 0.000595 | 0.005521 | 1.051297 | Positive | 713.1   | 713.1   | 2.83     | 712.1                 | [M+H] <sup>+</sup> | Quercetin 5-O-malonylhexosyl-hexoside                     | Flavonol                       |
| Mul0152 | -0.92323                        | 0.009675 | 0.02932  | 2.432712 | Positive | 627.1   | 430     | 2.65     | 626.1                 | [M+H] <sup>+</sup> | 8-C-hexosyl-hesperetin O-hexoside                         | Flavone C-glycosides           |
| Mul0531 | 0.966193                        | 0.007041 | 0.024038 | 3.014463 | Negative | 463.132 | 301.1   | 3.88     | 464.132               | [M-H] <sup>-</sup> | Hesperetin 5-O-glucoside                                  | Flavanone                      |
| Mul0269 | -3.02987                        | 0.005179 | 0.020373 | 2.51429  | Positive | 273.1   | 137.1   | 5.3      | 272.069               | [M+H] <sup>+</sup> | Butein                                                    | Flavanone                      |
| Mul0233 | 18.64135                        | 0.000578 | 0.005452 | 1.714918 | Positive | 611.19  | 303     | 3.99     | 610.19                | [M+H] <sup>+</sup> | Hesperetin 7-rutinoside (Hesperidin)                      | Flavanone                      |
| Mul0413 | -1.46804                        | 0.005017 | 0.019869 | 3.890246 | Negative | 191     | 85      | 1.22     | 192.063               | [M-H] <sup>-</sup> | Quinic acid                                               | Quinate and its derivatives    |
| Mul0445 | -18.8981                        | 0.001273 | 0.008792 | 1.871537 | Negative | 355.1   | 181.2   | 1.97     | 356.1                 | [M-H] <sup>-</sup> | Homovanilloyl quinic acid                                 | Quinate and its derivatives    |
| Mul0508 | 0.609344                        | 0.026779 | 0.057843 | 1.706714 | Negative | 337.1   | 190.9   | 3.44     | 338.1                 | [M-H] <sup>-</sup> | 3-O-p-Coumaroyl quinic acid                               | Quinate and its derivatives    |
| Mul0215 | 8.723201                        | 0.006962 | 0.023905 | 1.106944 | Positive | 321.1   | 147.5   | 3.68     | 320.1                 | [M+H] <sup>+</sup> | 5-O-p-Coumaroyl shikimic acid                             | Quinate and its derivatives    |
| Mul0477 | -1.49406                        | 0.000295 | 0.004175 | 1.70672  | Negative | 341     | 179.1   | 2.62     | 342.132               | [M-H] <sup>-</sup> | Coniferin                                                 | Hydroxycinnamoyl derivatives   |
| Mul0050 | -1.51908                        | 0.010674 | 0.031437 | 2.070708 | Positive | 138     | 137.9   | 0.8      | 137.048               | [M+H] <sup>+</sup> | Trigonelline                                              | Alkaloids                      |
| Mul0074 | 2.505332                        | 0.000351 | 0.004409 | 1.125143 | Positive | 86.1    | 56      | 1.17     | 85.1                  | [M+H] <sup>+</sup> | Piperidine                                                | Alkaloids                      |
| Mul0398 | 2.328446                        | 0.001041 | 0.007728 | 1.739124 | Negative | 259     | 96.9    | 0.99     | 260.03                | [M-H] <sup>-</sup> | D-Glucose 6-phosphate                                     | Carbohydrates                  |
| Mul0376 | -1.62938                        | 0.045979 | 0.084819 | 1.706329 | Negative | 179     | 70.9    | 0.77     | 180.063               | [M-H] <sup>-</sup> | D(+)-Glucose                                              | Carbohydrates                  |
| Mul0149 | 1.124494                        | 0.037024 | 0.072105 | 1.285352 | Positive | 341     | 179.1   | 2.58     | 340.079               | [M+H] <sup>+</sup> | Esculin (6,7-Dihydroxycoumarin-6-glucoside)               | Coumarins                      |
| Mul0047 | -1.16566                        | 0.02939  | 0.062738 | 1.675012 | Positive | 256.2   | 124     | 0.8      | 255.2                 | [M+H] <sup>+</sup> | Nicotinate ribonucleoside                                 | Nicotinic acid derivatives     |
| Mul0139 | 2.699733                        | 0.001198 | 0.00847  | 1.064639 | Positive | 206.1   | 147.5   | 2.39     | 205.1                 | [M+H] <sup>+</sup> | Methoxyindoleacetic acid                                  | Indole derivatives             |
| Mul0418 | 2.850806                        | 6.09E-05 | 0.002413 | 4.913999 | Negative | 133     | 70.8    | 1.23     | 134.022               | [M-H] <sup>-</sup> | L(-)-Malic acid                                           | Organic acids                  |
| Mul0427 | 1.976722                        | 0.000151 | 0.002849 | 4.212903 | Negative | 117.03  | 99.9    | 1.31     | 118.027               | [M-H] <sup>-</sup> | Succinic acid                                             | Organic acids                  |
| Mul0434 | 1.452999                        | 0.000617 | 0.005637 | 3.189504 | Negative | 117.02  | 100     | 1.55     | 118.0266              | [M-H] <sup>-</sup> | Methylmalonic acid                                        | Organic acids                  |
| Mul0025 | 2.64545                         | 0.000146 | 0.002849 | 2.087319 | Positive | 132.1   | 86.2    | 0.75     | 131.1                 | [M+H] <sup>+</sup> | 5-Aminolevulinate                                         | Organic acids                  |
| Mul0480 | 1.456675                        | 0.000208 | 0.003195 | 2.061985 | Negative | 175.1   | 131.3   | 2.73     | 176.1                 | [M-H] <sup>-</sup> | 2-Isopropylmalate                                         | Organic acids                  |



|         |          |          |          |          |          |         |       |      |          |        |                                               |                             |
|---------|----------|----------|----------|----------|----------|---------|-------|------|----------|--------|-----------------------------------------------|-----------------------------|
| Mul0450 | 0.757568 | 0.002087 | 0.012647 | 1.157112 | Negative | 131.042 | 86.9  | 2.15 | 132.0423 | [M-H]- | 2-Methylsuccinic acid                         | Organic acids               |
| Mul0067 | 2.868755 | 0.000163 | 0.002942 | 1.080412 | Positive | 132.095 | 76.9  | 0.93 | 131.0946 | [M+H]+ | 6-Aminocaproic acid                           | Organic acids               |
| Mul0490 | -2.75018 | 0.021653 | 0.050046 | 1.016282 | Negative | 137.03  | 92.5  | 2.98 | 138.032  | [M-H]- | 4-Hydroxybenzoic acid                         | Organic acids               |
| Mul0318 | 3.636946 | 0.00021  | 0.003195 | 4.270911 | Positive | 520     | 125   | 8.08 | 519      | [M+H]+ | LysoPC 18:2 (2n isomer)                       | Lipids_Glycerophospholipids |
| Mul0315 | -3.1916  | 0.001914 | 0.011966 | 3.59373  | Positive | 494.3   | 184.6 | 7.71 | 493.3    | [M+H]+ | LysoPC 16:1 (2n isomer)                       | Lipids_Glycerophospholipids |
| Mul0588 | 1.65101  | 0.021884 | 0.050382 | 3.436401 | Negative | 452     | 255.3 | 8.57 | 453      | [M-H]- | LysoPE 16:0                                   | Lipids_Glycerophospholipids |
| Mul0335 | 0.632806 | 0.018268 | 0.043405 | 3.032388 | Positive | 496.3   | 478.3 | 8.65 | 495.3    | [M+H]+ | LysoPC 16:0                                   | Lipids_Glycerophospholipids |
| Mul0336 | 0.810786 | 0.016636 | 0.041004 | 3.004758 | Positive | 522.4   | 184.5 | 8.76 | 521.4    | [M+H]+ | LysoPC 18:1 (2n isomer)                       | Lipids_Glycerophospholipids |
| Mul0326 | 4.402583 | 0.002378 | 0.013324 | 2.416415 | Positive | 520.3   | 502.3 | 8.27 | 519.3    | [M+H]+ | LysoPC 18:2                                   | Lipids_Glycerophospholipids |
| Mul0331 | 1.185721 | 0.032205 | 0.066888 | 1.739536 | Positive | 496.33  | 478.3 | 8.49 | 495.33   | [M+H]+ | LysoPC 16:0 (2n isomer)                       | Lipids_Glycerophospholipids |
| Mul0313 | 6.890017 | 0.015719 | 0.040483 | 1.430511 | Positive | 468.1   | 450.5 | 7.57 | 467.1    | [M+H]+ | LysoPC 14:0                                   | Lipids_Glycerophospholipids |
| Mul0334 | 1.1438   | 0.017493 | 0.042068 | 1.32586  | Positive | 518.3   | 459.6 | 8.65 | 517.3    | [M+H]+ | LysoPC 18:3                                   | Lipids_Glycerophospholipids |
| Mul0323 | 5.451924 | 0.001856 | 0.011853 | 1.149302 | Positive | 478.6   | 337.9 | 8.2  | 477.6    | [M+H]+ | LysoPE 18:2 (2n isomer)                       | Lipids_Glycerophospholipids |
| Mul0587 | 2.55955  | 0.013398 | 0.036175 | 1.144428 | Negative | 452.3   | 255.3 | 8.4  | 453.3    | [M-H]- | LysoPE 16:0 (2n isomer)                       | Lipids_Glycerophospholipids |
| Mul0589 | 0.982282 | 0.014343 | 0.037866 | 1.045934 | Negative | 478.1   | 281.3 | 8.69 | 479.1    | [M-H]- | LysoPE 18:1 (2n isomer)                       | Lipids_Glycerophospholipids |
| Mul0353 | -1.79664 | 0.000416 | 0.004583 | 2.216916 | Positive | 353.2   | 261.8 | 9.91 | 352.2    | [M+H]+ | MAG (18:3) isomer1                            | Lipids_Glycerolipids        |
| Mul0338 | 1.505818 | 0.011019 | 0.031928 | 2.215065 | Positive | 279.3   | 201.5 | 8.81 | 278.3    | [M+H]+ | Punicic acid                                  | Lipids_Fatty acids          |
| Mul0345 | 2.452674 | 0.014471 | 0.038034 | 2.01394  | Positive | 295.2   | 179.5 | 9.17 | 294.2    | [M+H]+ | 9-Hydroxy-(10E,12Z,15Z)-octadecatrienoic acid | Lipids_Fatty acids          |
| Mul0590 | 1.49988  | 0.012081 | 0.034436 | 1.855271 | Negative | 295     | 183.3 | 8.82 | 296      | [M-H]- | 9,10-EODE                                     | Lipids_Fatty acids          |
| Mul0544 | -6.33719 | 0.000485 | 0.004886 | 5.19421  | Negative | 137     | 92.8  | 4.07 | 138.032  | [M-H]- | Salicylic acid (SA)                           | Phytohormones               |
| Mul0444 | -5.59902 | 0.002288 | 0.013199 | 3.553304 | Negative | 299.1   | 137.2 | 1.96 | 300.1    | [M-H]- | Salicylic acid O-glucoside                    | Phytohormones               |

Supplementary Table S4. Differentially accumulated metabolites between HG2 and BYW.

| Index   | log2_FC(case_mean/control_mean) | Pvalue   | fdr      | vip      | Ion mode | Q1 (Da) | Q3 (Da) | Rt (min) | Molecular Weight (Da) | Ionization model   | Compounds                                                 | Class                          |
|---------|---------------------------------|----------|----------|----------|----------|---------|---------|----------|-----------------------|--------------------|-----------------------------------------------------------|--------------------------------|
| Mul0056 | 1.561504                        | 0.000574 | 0.004732 | 2.898584 | Positive | 118.1   | 71.8    | 0.81     | 117.079               | [M+H] <sup>+</sup> | L-Valine                                                  | Amino acids                    |
| Mul0064 | 1.575115                        | 0.000649 | 0.005004 | 2.802461 | Positive | 118     | 88      | 0.85     | 117.079               | [M+H] <sup>+</sup> | DL-Norvaline                                              | Amino acids                    |
| Mul0092 | 0.4197                          | 0.002011 | 0.009406 | 2.780579 | Positive | 132     | 85.9    | 1.23     | 131.0946              | [M+H] <sup>+</sup> | L-Isoleucine                                              | Amino acids                    |
| Mul0097 | 0.362117                        | 0.001691 | 0.008439 | 2.636583 | Positive | 132.1   | 86      | 1.27     | 131.0946              | [M+H] <sup>+</sup> | L-Leucine                                                 | Amino acids                    |
| Mul0367 | 2.026472                        | 0.000274 | 0.00362  | 2.568908 | Negative | 131.054 | 71.8    | 0.75     | 132.054               | [M-H] <sup>-</sup> | L-Asparagine                                              | Amino acids                    |
| Mul0374 | 1.561211                        | 0.001238 | 0.00699  | 1.628287 | Negative | 132     | 99.9    | 0.77     | 133.0375              | [M-H] <sup>-</sup> | L-Aspartic acid                                           | Amino acids                    |
| Mul0094 | 2.819428                        | 8.37E-05 | 0.002106 | 3.840097 | Positive | 130     | 83.9    | 1.24     | 129.043               | [M+H] <sup>+</sup> | 5-oxoproline                                              | Amino acid derivatives         |
| Mul0077 | -6.71187                        | 0.000565 | 0.004728 | 1.444157 | Positive | 308     | 162     | 1.18     | 307.084               | [M+H] <sup>+</sup> | Glutathione reduced form                                  | Amino acid derivatives         |
| Mul0443 | -1.06751                        | 0.029846 | 0.065576 | 1.484179 | Negative | 315.1   | 152.1   | 1.93     | 316.1                 | [M-H] <sup>-</sup> | 2,5-dihydroxy benzoic acid O-hexside                      | Benzoic acid derivatives       |
| Mul0039 | 1.549138                        | 0.000977 | 0.00652  | 2.304508 | Positive | 104.1   | 60.2    | 0.78     | 103.1                 | [M+H] <sup>+</sup> | Choline                                                   | Cholines                       |
| Mul0140 | -7.19485                        | 0.005355 | 0.018698 | 2.99802  | Positive | 611.2   | 611.1   | 2.39     | 610.2                 | [M+H] <sup>+</sup> | Gallocatechin-gallocatechin                               | Catechin derivatives           |
| Mul0001 | -0.29401                        | 0.008255 | 0.025147 | 1.132749 | Positive | 203     | 112     | 0.54     | 202                   | [M+H] <sup>+</sup> | Spermine                                                  | Phenolamines                   |
| Mul0120 | 0.720114                        | 0.000236 | 0.003334 | 2.647598 | Positive | 167.1   | 121     | 1.95     | 166.1                 | [M+H] <sup>+</sup> | 6-Methylmercaptapurine                                    | Nucleotide and its derivatives |
| Mul0084 | 2.254285                        | 0.000555 | 0.004709 | 1.54097  | Positive | 136.1   | 136.1   | 1.21     | 135.0545              | [M+H] <sup>+</sup> | Adenine                                                   | Nucleotide and its derivatives |
| Mul0460 | -4.35023                        | 0.001593 | 0.008228 | 8.948604 | Negative | 465.1   | 285.3   | 2.41     | 466.1                 | [M-H] <sup>-</sup> | Cyanidin O-syringic acid                                  | Anthocyanins                   |
| Mul0145 | -21.8716                        | 1.85E-05 | 0.001761 | 4.929835 | Positive | 449.1   | 287.3   | 2.45     | 449.1                 | Protonated         | Cyanidin 3-O-glucoside (Kuromanin)                        | Anthocyanins                   |
| Mul0150 | -0.68824                        | 0.007661 | 0.023658 | 2.668597 | Positive | 595     | 287.9   | 2.6      | 595                   | Protonated         | Cyanidin 3-O-rutinoside (Keracyanin)                      | Anthocyanins                   |
| Mul0173 | -4.97923                        | 0.000233 | 0.003334 | 2.266757 | Positive | 463.123 | 301.4   | 3        | 463.123               | Protonated         | Peonidin O-hexoside                                       | Anthocyanins                   |
| Mul0148 | 18.41852                        | 0.016506 | 0.041722 | 1.407497 | Positive | 433.1   | 271     | 2.58     | 433.1                 | Protonated         | Pelargonidin 3-O-beta-D-glucoside (Callistephin chloride) | Anthocyanins                   |
| Mul0530 | 7.709239                        | 4.77E-07 | 0.000284 | 1.397094 | Negative | 503.1   | 341.3   | 3.88     | 504.1                 | [M-H] <sup>-</sup> | Chrysoeriol O-acetylhexoside                              | Flavone                        |
| Mul0515 | -1.91744                        | 0.002114 | 0.009683 | 1.046573 | Negative | 521.1   | 329.3   | 3.68     | 522.1                 | [M-H] <sup>-</sup> | Tricin O-saccharic acid                                   | Flavone                        |
| Mul0529 | 7.511568                        | 0.000805 | 0.005624 | 4.234331 | Negative | 505.1   | 301.2   | 3.87     | 506.1                 | [M-H] <sup>-</sup> | Quercetin O-acetylhexoside                                | Flavonol                       |
| Mul0524 | -2.82789                        | 3.26E-05 | 0.001761 | 3.926413 | Negative | 593.159 | 285.1   | 3.77     | 594.1585              | [M-H] <sup>-</sup> | Kaempferol 3-O-rutinoside (Nicotiflorin)                  | Flavonol                       |
| Mul0516 | -0.96147                        | 0.000718 | 0.005199 | 3.870477 | Negative | 463     | 301.1   | 3.68     | 464.096               | [M-H] <sup>-</sup> | Quercetin 3-O-glucoside (Isotrifoliin)                    | Flavonol                       |
| Mul0217 | -2.30053                        | 0.000143 | 0.00266  | 3.052021 | Positive | 595.159 | 287     | 3.7      | 594.159               | [M+H] <sup>+</sup> | Kaempferol 3-O-robinobioside (Biorobin)                   | Flavonol                       |
| Mul0219 | -0.62753                        | 0.000894 | 0.006177 | 2.912885 | Positive | 611.2   | 303.7   | 3.73     | 610.2                 | [M+H] <sup>+</sup> | Quercetin 7-O-rutinoside                                  | Flavonol                       |
| Mul0201 | -0.54884                        | 0.012824 | 0.034783 | 2.669649 | Positive | 611.153 | 303     | 3.51     | 610.153               | [M+H] <sup>+</sup> | Quercetin 3-O-rutinoside (Rutin)                          | Flavonol                       |
| Mul0239 | -0.36436                        | 0.005761 | 0.01901  | 2.146034 | Positive | 465     | 302.9   | 4.04     | 464.096               | [M+H] <sup>+</sup> | Quercetin 4'-O-glucoside (Spiraeoside)                    | Flavonol                       |
| Mul0162 | 17.62822                        | 0.000207 | 0.003185 | 1.128998 | Positive | 713.1   | 713.1   | 2.83     | 712.1                 | [M+H] <sup>+</sup> | Quercetin 5-O-malonylhexosyl-hexoside                     | Flavonol                       |
| Mul0577 | 2.838234                        | 0.011357 | 0.031921 | 1.049348 | Negative | 329.1   | 314.3   | 5.76     | 330.1                 | [M-H] <sup>-</sup> | Di-O-methylquercetin                                      | Flavonol                       |
| Mul0152 | 2.027396                        | 0.000798 | 0.005624 | 2.126526 | Positive | 627.1   | 430     | 2.65     | 626.1                 | [M+H] <sup>+</sup> | 8-C-hexosyl-hesperetin O-hexoside                         | Flavone C-glycosides           |
| Mul0501 | -1.87475                        | 0.003725 | 0.014184 | 1.666746 | Negative | 449.1   | 329.3   | 3.21     | 450.1                 | [M-H] <sup>-</sup> | Eriodictyol C-hexoside                                    | Flavone C-glycosides           |
| Mul0212 | -1.88469                        | 0.000486 | 0.004374 | 1.503384 | Positive | 611.2   | 299.8   | 3.67     | 610.2                 | [M+H] <sup>+</sup> | Luteolin 8-C-hexosyl-O-hexoside                           | Flavone C-glycosides           |
| Mul0531 | -0.87172                        | 0.001026 | 0.006554 | 3.700161 | Negative | 463.132 | 301.1   | 3.88     | 464.132               | [M-H] <sup>-</sup> | Hesperetin 5-O-glucoside                                  | Flavanone                      |
| Mul0233 | -2.29821                        | 0.000109 | 0.002407 | 3.18854  | Positive | 611.19  | 303     | 3.99     | 610.19                | [M+H] <sup>+</sup> | Hesperetin 7-rutinoside (Hesperidin)                      | Flavanone                      |
| Mul0260 | -2.97923                        | 0.012971 | 0.035021 | 2.221447 | Positive | 289.063 | 153.1   | 4.85     | 288.063               | [M+H] <sup>+</sup> | Eriodictyol                                               | Flavanone                      |
| Mul0546 | -3.24372                        | 0.000293 | 0.003659 | 1.964797 | Negative | 609.2   | 301.3   | 4.09     | 610.19                | [M-H] <sup>-</sup> | Hesperetin 7-O-neohesperidoside (Neohesperidin)           | Flavanone                      |
| Mul0413 | -2.87014                        | 0.006293 | 0.020097 | 6.796869 | Negative | 191     | 85      | 1.22     | 192.063               | [M-H] <sup>-</sup> | Quinic acid                                               | Quinate and its derivatives    |
| Mul0478 | 0.829689                        | 0.042367 | 0.086482 | 2.062756 | Negative | 353.095 | 191.1   | 2.69     | 354.0951              | [M-H] <sup>-</sup> | Chlorogenic acid (3-O-Caffeoylquinic acid)                | Quinate and its derivatives    |
| Mul0456 | 0.239501                        | 0.02939  | 0.065138 | 1.858831 | Negative | 353.1   | 191.1   | 2.21     | 354.095               | [M-H] <sup>-</sup> | 1-O-Caffeoyl quinic acid                                  | Quinate and its derivatives    |
| Mul0215 | 9.119339                        | 0.006949 | 0.021839 | 1.022803 | Positive | 321.1   | 147.5   | 3.68     | 320.1                 | [M+H] <sup>+</sup> | 5-O-p-Coumaroyl shikimic acid                             | Quinate and its derivatives    |
| Mul0477 | 4.011197                        | 0.001172 | 0.006922 | 1.133373 | Negative | 341     | 179.1   | 2.62     | 342.132               | [M-H] <sup>-</sup> | Coniferin                                                 | Hydroxycinnamoyl derivatives   |
| Mul0110 | -1.46409                        | 0.001764 | 0.008618 | 3.138517 | Positive | 177     | 160.2   | 1.66     | 176.095               | [M+H] <sup>+</sup> | serotonin                                                 | Tryptamine derivatives         |
| Mul0050 | -1.15915                        | 0.000406 | 0.00409  | 1.631196 | Positive | 138     | 137.9   | 0.8      | 137.048               | [M+H] <sup>+</sup> | Trigonelline                                              | Alkaloids                      |
| Mul0379 | 0.73187                         | 0.008483 | 0.025709 | 1.425679 | Negative | 341     | 58.8    | 0.78     | 342.1162              | [M-H] <sup>-</sup> | D-(+)-Sucrose                                             | Carbohydrates                  |
| Mul0376 | -0.89414                        | 0.018312 | 0.045322 | 1.065684 | Negative | 179     | 70.9    | 0.77     | 180.063               | [M-H] <sup>-</sup> | D-(+)-Glucose                                             | Carbohydrates                  |
| Mul0149 | 3.562936                        | 0.001687 | 0.008439 | 1.70681  | Positive | 341     | 179.1   | 2.58     | 340.079               | [M+H] <sup>+</sup> | Esculin (6,7-Dihydroxycoumarin-6-glucoside)               | Coumarins                      |
| Mul0047 | -0.65315                        | 0.000613 | 0.004921 | 1.139391 | Positive | 256.2   | 124     | 0.8      | 255.2                 | [M+H] <sup>+</sup> | Nicotinate ribonucleoside                                 | Nicotinic acid derivatives     |
| Mul0418 | 21.86038                        | 3.24E-05 | 0.001761 | 4.911363 | Negative | 133     | 70.8    | 1.23     | 134.022               | [M-H] <sup>-</sup> | L(-)-Malic acid                                           | Organic acids                  |
| Mul0427 | 4.25887                         | 0.000202 | 0.003185 | 4.391659 | Negative | 117.03  | 99.9    | 1.31     | 118.027               | [M-H] <sup>-</sup> | Succinic acid                                             | Organic acids                  |
| Mul0386 | -0.45621                        | 0.016668 | 0.041953 | 2.398184 | Negative | 191     | 131     | 0.81     | 192.027               | [M-H] <sup>-</sup> | Citric acid                                               | Organic acids                  |
| Mul0480 | 1.138898                        | 8.06E-05 | 0.002106 | 1.781241 | Negative | 175.1   | 131.3   | 2.73     | 176.1                 | [M-H] <sup>-</sup> | 2-Isopropylmalate                                         | Organic acids                  |
| Mul0025 | 1.526189                        | 0.000131 | 0.00266  | 1.71567  | Positive | 132.1   | 86.2    | 0.75     | 131.1                 | [M+H] <sup>+</sup> | 5-Aminolevulinic acid                                     | Organic acids                  |
| Mul0450 | 0.767389                        | 0.000954 | 0.006517 | 1.08689  | Negative | 131.042 | 86.9    | 2.15     | 132.0423              | [M-H] <sup>-</sup> | 2-Methylsuccinic acid                                     | Organic acids                  |
| Mul0318 | 1.525641                        | 0.027269 | 0.061355 | 3.112995 | Positive | 520     | 125     | 8.08     | 519                   | [M+H] <sup>+</sup> | LysoPC 18:2 (2n isomer)                                   | Lipids_Glycerophospholipids    |
| Mul0326 | 2.087306                        | 0.005734 | 0.01901  | 1.970729 | Positive | 520.3   | 502.3   | 8.27     | 519.3                 | [M+H] <sup>+</sup> | LysoPC 18:2                                               | Lipids_Glycerophospholipids    |
| Mul0331 | 2.253607                        | 0.010679 | 0.030643 | 1.946593 | Positive | 496.33  | 478.3   | 8.49     | 495.33                | [M+H] <sup>+</sup> | LysoPC 16:0 (2n isomer)                                   | Lipids_Glycerophospholipids    |
| Mul0587 | 2.583099                        | 0.013124 | 0.035275 | 1.046758 | Negative | 452.3   | 255.3   | 8.4      | 453.3                 | [M-H] <sup>-</sup> | LysoPE 16:0 (2n isomer)                                   | Lipids_Glycerophospholipids    |
| Mul0356 | -1.41914                        | 0.010944 | 0.031252 | 2.325112 | Positive | 355.1   | 337.9   | 10.36    | 354.1                 | [M+H] <sup>+</sup> | MAG (18:2)                                                | Lipids_Glycerolipids           |
| Mul0287 | -4.43296                        | 0.044453 | 0.088905 | 2.248124 | Positive | 318.3   | 300.9   | 6.63     | 317.3                 | [M+H] <sup>+</sup> | 4-Hydroxysphinganine                                      | Lipids_Fatty acids             |
| Mul0338 | 0.79865                         | 0.001247 | 0.00699  | 1.730812 | Positive | 279.3   | 201.5   | 8.81     | 278.3                 | [M+H] <sup>+</sup> | Punicic acid                                              | Lipids_Fatty acids             |
| Mul0345 | 1.603234                        | 0.022003 | 0.052489 | 1.687546 | Positive | 295.2   | 179.5   | 9.17     | 294.2                 | [M+H] <sup>+</sup> | 9-Hydroxy-(10E,12Z,15Z)-octadecatrienoic acid             | Lipids_Fatty acids             |

|         |          |          |          |          |          |     |       |      |         |        |                                   |                    |
|---------|----------|----------|----------|----------|----------|-----|-------|------|---------|--------|-----------------------------------|--------------------|
| Mul0590 | 1.033979 | 0.000513 | 0.004545 | 1.60706  | Negative | 295 | 183.3 | 8.82 | 296     | [M-H]- | 9,10-EODE                         | Lipids_Fatty acids |
| Mul0566 | 1.04875  | 0.020197 | 0.049371 | 1.005155 | Negative | 263 | 153.2 | 4.93 | 264.136 | [M-H]- | (+)-cis,trans-Abscisic acid (ABA) | Phytohormones      |

---

**Supplementary Table S5. Statistics of the sequencing reads for mulberry fruits.**

| <b>Sequencing details</b> | <b>CS-1</b> | <b>CS-2</b> | <b>CS-3</b> | <b>HG2-1</b> | <b>HG2-2</b> | <b>HG2-3</b> | <b>BYW-1</b> | <b>BYW-2</b> | <b>BYW-3</b> |
|---------------------------|-------------|-------------|-------------|--------------|--------------|--------------|--------------|--------------|--------------|
| Raw reads                 | 46837546    | 45809226    | 45936772    | 45296040     | 48417824     | 50684876     | 46650630     | 46498720     | 57557936     |
| Clean reads               | 45704960    | 44576292    | 44390454    | 44081086     | 46640874     | 49137728     | 44845108     | 45172650     | 56284532     |
| Clean bases               | 6.27G       | 6.10G       | 6.06G       | 6.03G        | 6.36G        | 6.72G        | 6.11G        | 6.19G        | 7.72G        |
| Q20 (%)                   | 98.29       | 98.19       | 97.99       | 98.23        | 97.94        | 98.10        | 97.86        | 98.13        | 98.22        |
| Q30 (%)                   | 95.01       | 94.75       | 94.31       | 94.87        | 94.19        | 94.55        | 93.97        | 94.61        | 94.64        |
| GC (%)                    | 46.77       | 47.27       | 47.28       | 46.97        | 46.95        | 46.99        | 48.32        | 47.41        | 47.05        |

**Supplementary Table S6. Structural genes involved in flavonoid metabolic pathway in mulberry fruits.**

| <b>Function</b>                   | <b>Gene</b>    | <b>Enzyme</b>                                       | <b>KO id (EC no.)</b> | <b>No. All<sup>a</sup></b> | <b>No. Changed<sup>b</sup></b> |
|-----------------------------------|----------------|-----------------------------------------------------|-----------------------|----------------------------|--------------------------------|
| Phenylpropanoid biosynthesis      | <i>PAL</i>     | Phenylalanine ammonia-lyase                         | k10775 (4.3.1.24)     | 6                          | 6                              |
|                                   | <i>C4H</i>     | Trans-cinnamate 4-monooxygenase                     | k00487 (1.14.13.11)   | 4                          | 3                              |
|                                   | <i>4CL</i>     | 4-coumarate--CoA ligase                             | k01904 (6.2.1.12)     | 7                          | 6                              |
| Anthocyanin biosynthesis          | <i>CHS</i>     | Chalcone synthase                                   | K00660 (2.3.1.74)     | 7                          | 6                              |
|                                   | <i>CHI</i>     | Chalcone isomerase                                  | K01859 (5.5.1.6)      | 2                          | 2                              |
|                                   | <i>F3H</i>     | Flavanone 3-hydroxylase                             | K00475 (1.14.11.9)    | 2                          | 2                              |
|                                   | <i>CYP75B1</i> | <b>Flavonoid 3'-hydroxylase</b>                     | K05280 (1.14.13.21)   | 1                          | 1                              |
|                                   | <i>CYP75B2</i> | <b>Flavonoid 3'-hydroxylase</b>                     | K05280 (1.14.13.21)   | 2                          | 2                              |
|                                   | <i>DFR</i>     | Dihydroflavonol 4-reductase                         | K13082 (1.1.1.219)    | 1                          | 1                              |
|                                   | <i>ANS</i>     | Anthocyanidin synthase                              | K05277 (1.14.11.19)   | 1                          | 1                              |
|                                   | <i>UFGT</i>    | Anthocyanidin 3-O-glucosyltransferase               | K12930 (2.4.1.115)    | 1                          | 1                              |
|                                   | <i>UGAT</i>    | Cyanidin-3-O-glucoside 2"-O-glucuronosyltransferase | k12937 (2.4.1.254)    | 1                          | 1                              |
|                                   | <i>UGT75C1</i> | Anthocyanidin 3-O-glucoside 5-O-glucosyltransferase | K12338 (2.4.1. 298)   | 1                          | 1                              |
| Flavone and flavonol biosynthesis | <i>FNS</i>     | Flavone synthase                                    | K13077 (1.14.11.22)   | 1                          | 1                              |
|                                   | <i>FLS</i>     | Flavonol synthase                                   | K05278 (1.14.11.23)   | 2                          | 1                              |
| Flavanone biosynthesis            | <i>LAR</i>     | Leucoanthocyanidin reductase                        | K13081 (1.17.1.3)     | 1                          | 1                              |
|                                   | <i>ANR</i>     | Anthocyanidin reductase                             | K08695 (1.3.1.77)     | 1                          | 1                              |

<sup>a</sup> No. All, the total number of uni-transcripts analysed.

<sup>b</sup> No.Changed, the number of uni-transcripts with expression significantly changed in fruits of Mulberry among the three cultivars.



**Supplementary Table S7. Plant materials used in this study.**

| <b>Abbreviation</b> | <b>Cultivars</b>                                                       | <b>Collection date</b> | <b>Collection place</b>                | <b>Fruit color</b>         |
|---------------------|------------------------------------------------------------------------|------------------------|----------------------------------------|----------------------------|
| CS                  | <i>Morus notabilis</i> C.K. Schneid                                    | August                 | Ya'an City, Sichuan Province, China    | Yellow-green color         |
| HG2                 | <i>Morus alba</i> L. cv. Hongguo2                                      | May                    | Beibei District, Chongqing City, China | Purple color               |
| D10                 | <i>Morus alba</i> L. cv. Da10                                          | May                    | Beibei District, Chongqing City, China | Purple color               |
| BYW                 | <i>Morus alba</i> L. cv. Baiyuwang                                     | June                   | Beibei District, Chongqing City, China | Oyster-white color         |
| ZZB                 | <i>Morus alba</i> L. cv. Zhenzhubai                                    | June                   | Beibei District, Chongqing City, China | White color                |
| LJ109               | <i>Morus alba</i> L. cv. Lunjiao109 (Monoecious)                       | May                    | Beibei District, Chongqing City, China | Red color                  |
| HGDBZZ              | <i>Morus alba</i> L. cv. Hanguodabaizhenzhu                            | June                   | Beibei District, Chongqing City, China | Oyster-white color         |
| F1-W                | F1 population derived from LJ109 (male parent) and ZZB (female parent) | June                   | Beibei District, Chongqing City, China | White color                |
| F1-Male             | F1 population derived from LJ109 (male parent) and ZZB (female parent) | May                    | Beibei District, Chongqing City, China | No fruit, male tree        |
| F2-P                | F2 population derived from F1-W and F1-Male                            | May                    | Beibei District, Chongqing City, China | Red alternating with white |
| F2-R                | F2 population derived from F1-W and F1-Male                            | May                    | Beibei District, Chongqing City, China | Red color                  |
| F2-W                | F2 population derived from F1-W and F1-Male                            | June                   | Beibei District, Chongqing City, China | White color                |

**Supplementary Table S8. Primers used in this work.**

| Primer Name                                                            | Forward primer                                  | Reverse primer                                    |
|------------------------------------------------------------------------|-------------------------------------------------|---------------------------------------------------|
| <b>Primers used for cloning candidate mulberry genes.</b>              |                                                 |                                                   |
| <i>MYBA</i>                                                            | 5'-ATGCAAACGGAGGGCTGTTC-3'                      | 5'-CTACTGCATTTTCAGCATTTTCCT-3'                    |
| <i>TT2L1</i>                                                           | 5'-ATGGGAAGAAACCCTTGTTGC-3'                     | 5'-TTAATCAGTCAACCAGTTTTCTTCATCG-3'                |
| <i>TT2L2</i>                                                           | 5'-ATGGGAAGAAAACCTTGTTGTTCAA-3'                 | 5'-TTAAACTTGAAGCCACCTATCGAAG-3'                   |
| <i>TT2L3</i>                                                           | 5'-GATCTGGAGAGGGAGAGTGA-3'                      | 5'-TTATAGGGCTAGAGTAAAGTCAATA-3'                   |
| <i>bHLH3</i>                                                           | 5'-ATGTCTTGTCTTGATTTGACCTTCT-3'                 | 5'-TCAATTATCGCTGTGGGGTAT-3'                       |
| <i>GL3</i>                                                             | 5'-ATGGCTACTGGGCTCCAAAAC-3'                     | 5'-TCAACTGTTCCAAGCAATTCTCTG-3'                    |
| <i>TTG1</i>                                                            | 5'-AATTTTCCGTTATTCTGGCG-3'                      | 5'-AGCAAGAAAAATAAAAATCAAAAAG-3'                   |
| <i>MYBF</i>                                                            | 5'-ATGGGAAGAGCTCCGTGCT-3'                       | 5'-TCAGGAGAGAAGCCAAGCGA-3'                        |
| <i>MYB4</i>                                                            | 5'-ATGAACAAAGGAGCTTGGTCAA-3'                    | 5'-TCATGTGAAGAGATTTTGAAGCGT-3'                    |
| <i>CYP75B1</i>                                                         | 5'-ATGGCCTCTATCACCACCAT-3'                      | 5'-TCAATATAAGTGTGGTCTAGTCT-3'                     |
| <i>CYP75B2</i>                                                         | 5'-ATGCCCTCTATCTTACCATTCT-3'                    | 5'-CTAAATTTTTGCTTCATATACATG-3'                    |
| <i>L484_012842</i>                                                     | 5'-AGTAATTCATTATGGACTCCTCG-3'                   | 5'-ATTTACACAAACAATCACCACACAT-3'                   |
| <b>Primers for cell-feeding assays in yeast</b>                        |                                                 |                                                   |
| <i>CYP75B-pYES2</i>                                                    | 5'-accgagctcgatccATGGCCTCTATCACCACCAT-3'        | 5'-agatgcatgctcgagTCAATATAAGTGTGGTCTAGTCT-3'      |
| <i>CYP75B2-pYES2</i>                                                   | 5'-accgagctcgatccATGCCCTCTATCTTACCATTCT-3'      | 5'-agatgcatgctcgagCTAAATTTTTGCTTCATATACATG-3'     |
| <i>L484_012842-pYES2</i>                                               | 5'-accgagctcgatccATGGACTCCTCGTCGTCGT-3'         | 5'-agatgcatgctcgagTCACCACACATCACGTAGATACCT-3'     |
| <b>Primers for dual-luciferase reporter and transient color assays</b> |                                                 |                                                   |
| <i>CHS2P-LUC</i>                                                       | 5'-ggtatcgataagcttGTCTGAAAACAGGAGTCGGA-3'       | 5'-agaactagtggatccTTTCAAAGAATTCACCGAGGATCT-3'     |
| <i>CHIP-LUC</i>                                                        | 5'-ggtatcgataagcttGTAGCCTCATTTTCGTCCTTT-3'      | 5'-agaactagtggatccTTGGGTTTCGGTTTTTGTGTA-3'        |
| <i>FNSIP-LUC</i>                                                       | 5'-ggtatcgataagcttTACGCAATTTTATACAAATCGAC-3'    | 5'-agaactagtggatccTTATTACTTGTCTGTAAGATGTCAAAT-3'  |
| <i>CYP75B1P-LUC</i>                                                    | 5'-ggtatcgataagcttAAATTTCTTGCACGCAATTA-3'       | 5'-agaactagtggatccAAGATAAAAGAGTTTCTGGAAGC-3'      |
| <i>CYP75B2P-LUC</i>                                                    | 5'-ggtatcgataagcttTTTGGGCAAAGCAGGGACTA-3'       | 5'-agaactagtggatccTGTGCTGTCTATGTTTTGTTTTTTT-3'    |
| <i>FLSIP-LUC</i>                                                       | 5'-ggtatcgataagcttGAATCAGCGAACTAAACGGG-3'       | 5'-agaactagtggatccGTTGTCTACTTAGCTAGCTAGATATCTT-3' |
| <i>FLS3P-LUC</i>                                                       | 5'-ggtatcgataagcttTTTGAAGAACGCATAAAGGTC-3'      | 5'-agaactagtggatccGGCTACCAATAAGTTAAAGCTAG-3'      |
| <i>DFRP-LUC</i>                                                        | 5'-ggtatcgataagcttTAGCTAACGGTACGTTTGGTAGTGA-3'  | 5'-agaactagtggatccATTGCTGCTAATCTTTTGAAGACA-3'     |
| <i>LARP-LUC</i>                                                        | 5'-ggtatcgataagcttTTTAGTCGACGTTGTGAGAGTATG-3'   | 5'-agaactagtggatccGTTTGTCTTTTTTTTTTTTTTTTTT-3'    |
| <i>ANRP-LUC</i>                                                        | 5'-ggtatcgataagcttCATATTTGACGTTAAGCCTCTACG-3'   | 5'-agaactagtggatccGGCTATTGGATTCTTATTTCTTTT-3'     |
| <i>ANSP-LUC</i>                                                        | 5'-ggtatcgataagcttTTGAAACAAGGAGGGTTAAACTCA-3'   | 5'-agaactagtggatccATTAGCCTAATTTGTACCCTACTTTTC-3'  |
| <i>UFGTP-LUC</i>                                                       | 5'-ggtatcgataagcttATGTTTGTCTCATTTCTCGTA-3'      | 5'-agaactagtggatccGGTAAGTTTGTATGGAGGT-3'          |
| <i>MYB4P-LUC</i>                                                       | 5'-ggtatcgataagcttGCTTGAATTACTTTTGTGCGTGTG-3'   | 5'-agaactagtggatccTTCTCGCTTCTCACAGCAAGG-3'        |
| <i>MYBA-SK</i>                                                         | 5'-agaactagtggatccATGCAAACGGAGGGCTGTTC-3'       | 5'-taccgaattggtaccCTACTGCATTTTCAGCATTTTCCT-3'     |
| <i>TT2L1-SK</i>                                                        | 5'-agaactagtggatccATGGGAAGAAACCCTTGTTGC-3'      | 5'-taccgaattggtaccTTAATCAGTCAACCAGTTTTCTTCATCG-3' |
| <i>TT2L2-SK</i>                                                        | 5'-agaactagtggatccATGGGAAGAAAACCTTGTTGTTCAA-3'  | 5'-taccgaattggtaccTTAAACTTGAAGCCACCTATCGAAG-3'    |
| <i>TT2L3-SK</i>                                                        | 5'-agaactagtggatccATGGGAGAGAGACGTCCTCG-3'       | 5'-taccgaattggtaccTCAATATTGTTGATCAGGAAAGGT-3'     |
| <i>bHLH3-SK</i>                                                        | 5'-agaactagtggatccATGTCTTGTCTTGATTTGACCTTCT-3'  | 5'-taccgaattggtaccTCAATTATCGCTGTGGGGTAT-3'        |
| <i>GL3-SK</i>                                                          | 5'-agaactagtggatccATGGCTACTGGGCTCCAAAAC-3'      | 5'-taccgaattggtaccTCAACTGTTCCAAGCAATTCTCTG-3'     |
| <i>TTG1-SK</i>                                                         | 5'-agaactagtggatccATGGAGAACACGACACAAGAATC-3'    | 5'-taccgaattggtaccTCAAACCTTTCAAAGCTGCATTT-3'      |
| <i>MYBF-SK</i>                                                         | 5'-agaactagtggatccATGGGAAGAGCTCCGTGCT-3'        | 5'-taccgaattggtaccTCAGGAGAGAAGCCAAGCGA-3'         |
| <i>MYB4-SK</i>                                                         | 5'-agaactagtggatccATGAACAAAGGAGCTTGGTCAA-3'     | 5'-taccgaattggtaccTCATGTGAAGAGATTTTGAAGCGT-3'     |
| <b>Primers for Y1H, Y2H and Y3H assays.</b>                            |                                                 |                                                   |
| <i>MYBA-AD</i>                                                         | 5'-gattacgctcatatgCAAACGGAGGGCTGTTC-3'          | 5'-catctgcagctcgagCTACTGCATTTTCAGCATTTTCCT-3'     |
| <i>TT2L1-AD</i>                                                        | 5'-gattacgctcatatgGGAAGAAACCCTTGTTGC-3'         | 5'-catctgcagctcgagTTAATCAGTCAACCAGTTTTCTTCATCG-3' |
| <i>TT2L2-AD</i>                                                        | 5'-gattacgctcatatgGGAAGAAAACCTTGTTGTTCAA-3'     | 5'-catctgcagctcgagTTAAACTTGAAGCCACCTATCGAAG-3'    |
| <i>TT2L3-AD</i>                                                        | 5'-gattacgctcatatgGGAGAGAGACGTCCTCG-3'          | 5'-tcatctgcagctcgagTCAATATTGTTGATCAGGAAAGGT-3'    |
| <i>TTG1-AD</i>                                                         | 5'-gattacgctcatatgGAGAACACGACACAAGAATC-3'       | 5'-catctgcagctcgagTCAAACCTTTCAAAGCTGCATTT-3'      |
| <i>MYBF-AD</i>                                                         | 5'-gattacgctcatatgGGAAGAGCTCCGTGCT-3'           | 5'-catctgcagctcgagTCAGGAGAGAAGCCAAGCGA-3'         |
| <i>MYB4-AD</i>                                                         | 5'-gattacgctcatatgAACAAAGGAGCTTGGTCAA-3'        | 5'-catctgcagctcgagTCATGTGAAGAGATTTTGAAGCGT-3'     |
| <i>MYBA-BK</i>                                                         | 5'-gaggacctgcatatgCAAACGGAGGGCTGTTC-3'          | 5'-caggtcgacggatccCTACTGCATTTTCAGCATTTTCCT-3'     |
| <i>TT2L1-BK</i>                                                        | 5'-gaggacctgcatatgGGAAGAAACCCTTGTTGC-3'         | 5'-caggtcgacggatccTTAATCAGTCAACCAGTTTTCTTCATCG-3' |
| <i>TT2L2-BK</i>                                                        | 5'-gaggacctgcatatgGGAAGAAAACCTTGTTGTTCAA-3'     | 5'-caggtcgacggatccTTAAACTTGAAGCCACCTATCGAAG-3'    |
| <i>TT2L3-BK</i>                                                        | 5'-gaggacctgcatatgGGAGAGAGACGTCCTCG-3'          | 5'-caggtcgacggatccTCAATATTGTTGATCAGGAAAGGT-3'     |
| <i>bHLH3-BK</i>                                                        | 5'-gaggacctgcatatgTCTTGTCTTGATTTGACCTTCT-3'     | 5'-caggtcgacggatccTCAATTATCGCTGTGGGGTAT-3'        |
| <i>GL3-BK</i>                                                          | 5'-gaggacctgcatatgGCTACTGGGCTCCAAAAC-3'         | 5'-caggtcgacggatccTCAACTGTTCCAAGCAATTCTCTG-3'     |
| <i>TTG1-BK</i>                                                         | 5'-gaggacctgcatatgGAGAACACGACACAAGAATC-3'       | 5'-caggtcgacggatccTCAAACCTTTCAAAGCTGCATTT-3'      |
| <i>MYBF-BK</i>                                                         | 5'-gaggacctgcatatgGGAAGAGCTCCGTGCT-3'           | 5'-caggtcgacggatccTCAGGAGAGAAGCCAAGCGA-3'         |
| <i>MYB4-BK</i>                                                         | 5'-gaggacctgcatatgAACAAAGGAGCTTGGTCAA-3'        | 5'-caggtcgacggatccTCATGTGAAGAGATTTTGAAGCGT-3'     |
| <i>ANSP-pBait</i>                                                      | 5'-GGGGTACCTTGAAACAAGGAGGGTTAAACTCA-3'          | 5'-CCGCTCGAGATTAGCCTAATTTGTACCCTACTTTTC-3'        |
| <i>LARP-pBait</i>                                                      | 5'-GGGGTACCTTTAGTCGACGTTGTGAGAGTATG-3'          | 5'-CCGCTCGAGGTTTGTCTTTTTTTTTTTTTTTTTTTT-3'        |
| <i>FLSIP-pBait</i>                                                     | 5'-GGGGTACCGAATCAGCGAACTAAACGGG-3'              | 5'-CCGCTCGAGGTTGTCTACTTAGCTAGCTAGATATCTT-3'       |
| <i>TTG1-pBridge</i>                                                    | 5'-gtatcgccggaattcATGGAGAACACGACACAAGAATC-3'    | 5'-caggtcgacggatccTCAAACCTTTCAAAGCTGCATTT-3'      |
| <i>bHLH3-pBridge</i>                                                   | 5'-aaaggtggcggccgcaATGTCTTGTCTTGATTTGACCTTCT-3' | 5'-tcagcccgaagatctTCAATTATCGCTGTGGGGTAT-3'        |
| <i>GL3-pBridge</i>                                                     | 5'-aaaggtggcggccgcaATGGCTACTGGGCTCCAAAAC-3'     | 5'-tcagcccgaagatctTCAACTGTTCCAAGCAATTCTCTG-3'     |
| <b>Primers for BiFC assays</b>                                         |                                                 |                                                   |

*MYBA-BiFC* 5'-gccactagtggatccATGCAAACGGAGGGCTGTTC-3' 5'-cccgggagcgggtaccCTGCATTTTCAGCATTTTCCT-3'  
*TT2L1-BiFC* 5'-gccactagtggatccATGGGAAGAAACCCCTTGTTC-3' 5'-cccgggagcgggtaccATCAGTCAACCAGTTTTCTTCATCG-3'  
*TT2L2-BiFC* 5'-gccactagtggatccATGGGAAGAAAACCTTGTTC-3' 5'-cccgggagcgggtaccAACTTGAAGCCACCTATCGAAG-3'  
*TT2L3-BiFC* 5'-gccactagtggatccATGGGAGAGAGACGTCCTCG-3' 5'-cccgggagcgggtaccATATTGTTGATCAGGAAAGGT-3'  
*TTG1-BiFC* 5'-gccactagtggatccATGGAGAACACGACACAAGAATC-3' 5'-cccgggagcgggtaccAACTTTCAAAGCTGCATTT-3'  
*MYB4-BiFC* 5'-gccactagtggatccATGAACAAAGGAGCTTGGTCAA-3' 5'-cccgggagcgggtaccTCATGTGAAGAGATTTTGAAGCGT-3'  
*bHLH3-BiFC* 5'-gccactagtggatccATGTCTTGTCTTGATTTGACCTTCT-3' 5'-cccgggagcgggtaccATTATCGCTGTGGGGTAT-3'  
*GL3-BiFC* 5'-gccactagtggatccATGGCTACTGGGCTCCAAAAC-3' 5'-cccgggagcgggtaccACTGTTCCAAGCAATTCTCTG-3'

**Primers for split luciferase complementation assays**

*MYBA-Nluc* 5'-gacgagctcgggtaccATGCAAACGGAGGGCTGTTC-3' 5'-ccatttggatccCTGCATTTTCAGCATTTTCCT-3'  
*TT2L1-Nluc* 5'-gacgagctcgggtaccATGGGAAGAAACCCCTTGTTC-3' 5'-ccatttggatccATCAGTCAACCAGTTTTCTTCATCG-3'  
 5'-gacgagctcgggtaccATGGGAAGAAAACCTTGTTC-3'  
*TT2L2-Nluc* 5'-gacgagctcgggtaccATGGGAGAGAGACGTCCTCG-3' 5'-ccatttggatccAACTTGAAGCCACCTATCGAAG-3'  
*TT2L3-Nluc* 5'-gacgagctcgggtaccATGGAGAACACGACACAAGAATC-3' 5'-ccatttggatccATATTGTTGATCAGGAAAGGT-3'  
*TTG1-Nluc* 5'-gacgagctcgggtaccATGGAGAACACGACACAAGAATC-3' 5'-ccatttggatccAACTTTCAAAGCTGCATTT-3'  
*MYB4-Nluc* 5'-gacgagctcgggtaccATGAACAAAGGAGCTTGGTCAA-3' 5'-ccatttggatccTGTGAAGAGATTTTGAAGCGT-3'  
*bHLH3-Cluc* 5'-tcccgggagcgggtaccATGTCTTGTCTTGATTTGACCTTCT-3' 5'-ccatttggatccTCAATTATCGCTGTGGGGTAT-3'  
*GL3-Cluc* 5'-tcccgggagcgggtaccATGGCTACTGGGCTCCAAAAC-3' 5'-ccatttggatccTCAACTGTTCCAAGCAATTCTCTG-3'  
*TTG1-Cluc* 5'-tcccgggagcgggtaccATGGAGAACACGACACAAGAATC-3' 5'-ccatttggatccTCAAACCTTTCAAAGCTGCATTT-3'

**Primers for transient expression studies in tobacco.**

5'-CGCGGATCCCATGTTGTGTGGACCTTTTTTATGTCC-3'  
*bHLH3P-GUS* 3'  
*MYB4P-GUS* 5'-CGCGGATCCGCTTGAATTACTTTTTGTGCGTGTG-3' 5'-CATGCCATGGTCTCACAAGCTGATCAGAGTTTCC-3'  
 5'-CATGCCATGGTTCTCGCTTCTCACAGCAAGG-3'

**Primers for subcellular localization (GFP) assays**

*MYBA-PZYG* 5'-agaggacaggtaccATGCAAACGGAGGGCTGTTC-3' 5'-gacactagtggatccCTGCATTTTCAGCATTTTCCT-3'  
*TT2L1-PZYG* 5'-agaggacaggtaccATGGGAAGAAACCCCTTGTTC-3' 5'-gacactagtggatccATCAGTCAACCAGTTTTCTTCATCG-3'  
 5'-agaggacaggtaccATGGGAAGAAAACCTTGTTC-3'  
*TT2L2-PZYG* 5'-agaggacaggtaccATGGGAGAGAGACGTCCTCG-3' 5'-gacactagtggatccAACTTGAAGCCACCTATCGAAG-3'  
*TT2L3-PZYG* 5'-agaggacaggtaccATGGGAGAGAGACGTCCTCG-3' 5'-gacactagtggatccATATTGTTGATCAGGAAAGGT-3'  
*bHLH3-PZYG* 5'-agaggacaggtaccATGTCTTGTCTTGATTTGACCTTCT-3' 5'-gacactagtggatccATTATCGCTGTGGGGTAT-3'  
*GL3-PZYG* 5'-agaggacaggtaccATGGCTACTGGGCTCCAAAAC-3' 5'-gacactagtggatccACTGTTCCAAGCAATTCTCTG-3'  
*TTG1-PZYG* 5'-agaggacaggtaccATGGAGAACACGACACAAGAATC-3' 5'-gacactagtggatccAACTTTCAAAGCTGCATTT-3'  
*MYBF-PZYG* 5'-agaggacaggtaccATGGGAAGAGCTCCGTGCT-3' 5'-gacactagtggatccGGAGAGAAGCCAAGCGA-3'  
*MYB4-PZYG* 5'-agaggacaggtaccATGAACAAAGGAGCTTGGTCAA-3' 5'-gacactagtggatccTGTGAAGAGATTTTGAAGCGT-3'

**Primers for transformation of tobacco and Arabidopsis.**

*MYBA-PLGNL* 5'-agaggacaggtaccATGCAAACGGAGGGCTGTTC-3' 5'-gacactagtggatccCTACTGCATTTTCAGCATTTTCCT-3'  
 5'-gacactagtggatccTTAATCAGTCAACCAGTTTTCTTCATCG-3'  
*TT2L1-PLGNL* 5'-agaggacaggtaccATGGGAAGAAACCCCTTGTTC-3' 5'-gacactagtggatccTTAAACTTGAAGCCACCTATCGAAG-3'  
 5'-agaggacaggtaccATGGGAAGAAAACCTTGTTC-3' 5'-gacactagtggatccTCAATTATCGCTGTGGGGTAT-3'  
*TT2L2-PLGNL* 5'-agaggacaggtaccATGTCTTGTCTTGATTTGACCTTCT-3' 5'-gacactagtggatccTCAACTGTTCCAAGCAATTCTCTG-3'  
*bHLH3-PLGNL* 5'-agaggacaggtaccATGGCTACTGGGCTCCAAAAC-3' 5'-gacactagtggatccTCAAACCTTTCAAAGCTGCATTT-3'  
*GL3-PLGNL* 5'-agaggacaggtaccATGGAGAACACGACACAAGAATC-3' 5'-gacactagtggatccTCAGGAGAGAAGCCAAGCGA-3'  
*TTG1-PLGNL* 5'-agaggacaggtaccATGGGAAGAGCTCCGTGCT-3' 5'-gacactagtggatccTCATGTGAAGAGATTTTGAAGCGT-3'  
*MYBF-PLGNL* 5'-agaggacaggtaccATGAACAAAGGAGCTTGGTCAA-3'

**Primers for qRT-PCR and semi quantitative RT-PCR assays.**

*CHS2* 5'-ATCATGGCAATCGGGACG-3' 5'-TGCTCACTGTTAGTAATACGGAAA-3'  
*CHI* 5'-GGGAAGTCGGTGGAGGAA-3' 5'-CGTCTGCGTCAGTGAAATC-3'  
*F3H* 5'-CGCCGTGCTGAGATTTG-3' 5'-CTAACCCTTACCCTGTA-3'  
*FNS* 5'-CCCTCACCATCCTGCTC-3' 5'-GCTTTCGGCGGGCTTAT-3'  
*CYP75B1* 5'-AATCAACGGCTACCACATCC-3' 5'-TCATACCCGCACAAATCCTAC-3'  
*CYP75B2* 5'-TATCAATGGCTACCACATACCTAA-3' 5'-CCGACCCAAATGGAATCAC-3'  
*FLS1* 5'-TTCCCGAGATACCCACCGTC-3' 5'-TTGGCGTAAACTCTTTCTCCT-3'  
*FLS3* 5'-CATCCCTACCGAGGTCATACG-3' 5'-TTCTTTCCATTACGATCTTTTG-3'  
*DFR* 5'-TTGTCGGACCGTAAAGATG-3' 5'-GCAGTGGGACCAAGAAAT-3'  
*LAR* 5'-TTTGGGCACGACGTAGAC-3' 5'-GCCATCACCGTAGATTTTG-3'  
*ANS* 5'-GCTTGCAGACCACATACTTT-3' 5'-TGCCGTCACCCATTTGC-3'  
*ANR* 5'-GTGTCAAAGCGAAAACGG-3' 5'-CACAGGGTAGCCCCAAGTA-3'  
*UFGT* 5'-GAGACGGGAGGGAGGTTAG-3' 5'-GGGTTCGTTTTCACTTCCTTTAG-3'  
*MYBA* 5'-GAAGCCGGATGTCAAAG-3' 5'-TCCTACCCGCAATCAACG-3'  
*TT2L1* 5'-GAATTACTGGAACACCAATTTAGG-3' 5'-TCTTATTGGACGGTGTATGCC-3'  
*TT2L2* 5'-TCCTTGGAACAGATGGT-3' 5'-TGTTTCTTGTTGGCTTTG-3'  
*TT2L3* 5'-CCGATGAAGGTTTCGAGTAGG-3' 5'-CTCCAGATTTCTTGAGTCCC-3'  
*bHLH3* 5'-TCCAGTGGCTCTTAAATAACATC-3' 5'-AAGGCACAAGCGACCTCAAT-3'  
*GL3* 5'-ACGGGATCATTTCTTAAATTATTCA-3' 5'-GTGAGAAAATAACAAGCTTCAACTGT-3'  
*TTG1* 5'-GGCTCCGCAGAGTTACAGAC-3' 5'-AAAGGCGATGGCGATCCAAT-3'  
*MYBF* 5'-TGTGAGAAAGTTGGGCTGAAG-3' 5'-CGGCATTCTTGGGTAGTGAT-3'  
*MYB4* 5'-GGTCACGAGGTTTCAGATGGC-3' 5'-TTTTCCCGATTTGGGCTTTA-3'  
*MaActin* 5'-GCATGAAGATCAAGGTGGTG-3' 5'-CATCTGCTGGAAGGTGCTAA-3'  
*NtActin* 5'-TCACAGAAGCTCCTCCTAATCCA-3' 5'-GAGGGAAAGAAGCCTGAATG-3'  
*AtActin* 5'-GCTCCTCTTAAACCAAAGGC-3' 5'-CACACCATCACCAGAATCCAGC-3'

**Primers for transgene detection**

*MYB4P-GUS-check* 5'-TCTTTAGCCTAAGTTTGCTGT-3'

5'-ACGCTGAGTAATTCGTTGAT-3'

---

The underline represents the restriction site;

Lower case letters: gene-specific primers with 15 bp extensions homologous to the ends of the linearized vector for In-Fusion cloning technology.

**Supplemental Table S9. Accession numbers of sequences used in this study.**

| <i>Species</i>                           | <i>Sequence Name</i> | <i>Accession numbers</i> |
|------------------------------------------|----------------------|--------------------------|
| <i>Antirrhinum majus</i>                 | AmDEL                | AAA32663                 |
| <i>Arabidopsis thaliana</i>              | AtCOP1               | NP_180854.1              |
|                                          | AtEGL3               | Q9CAD0                   |
|                                          | AtGL3                | NP_680372                |
|                                          | AtMYB11              | NP_191820.1              |
|                                          | AtMYB111             | NP_199744.1              |
|                                          | AtMYB113             | NP_176811.1              |
|                                          | AtMYB12              | NP_182268.1              |
|                                          | AtMYB3               | NP_564176.2              |
|                                          | AtMYB4               | NP_195574.1              |
|                                          | AtMYC1               | Q8W2F1                   |
|                                          | AtPAP1               | NP_176057.1              |
|                                          | AtPAP2               | NP_176813.1              |
|                                          | AtTT2                | NP_198405.1              |
|                                          | AtTT8                | Q9FT81                   |
|                                          | AtTTG1               | NP_001318637.1           |
| <i>Brassica napus</i>                    | BnTTG1               | XP_013643681.1           |
| <i>Brassica oleracea var. botrytis</i>   | BoTT8                | ADP76654                 |
|                                          | BoTTG1               | XP_013599438.1           |
| <i>Brassica rapa</i>                     | BrCOP1               | VDC70492.1               |
|                                          | BrTTG1               | XP_009150977.1           |
| <i>Cajanus cajan</i>                     | CcCOP1               | XP_020233903.1           |
| <i>Diospyros kaki</i>                    | DkMYB2               | AB503699.1               |
| <i>Epimedium sagittatum</i>              | EsMYBA1              | KC335202                 |
| <i>Fragaria x ananassa</i>               | FabHLH3              | AFL02463                 |
|                                          | FaMYB1               | AF401220_1               |
|                                          | FaMYB11              | AFL02461.1               |
| <i>Fagopyrum tataricum</i>               | FtMYB15;             | KX758436                 |
| <i>Fragaria vesca subsp. vesca</i>       | FvEGL1               | XP_004308377             |
| <i>Gossypium hirsutum</i>                | GhCOP1L              | XP_016696389.1           |
| <i>Garcinia mangostana</i>               | GmMYB10              | ACM62751.1               |
| <i>Gerbera hybrid cv. 'Terra Regina'</i> | GMYP10               | AJ554700                 |
| <i>Gentiana triflora</i>                 | GtMYBP3              | AB733016                 |
|                                          | GtMYBP4              | AB289446                 |
| <i>Hordeum vulgare subsp. Vulgare</i>    | HvMYB10              | AB645844                 |
| <i>Ipomoea nil</i>                       | InDEL                | BAE94393                 |
|                                          | InIVS                | BAE94394                 |
| <i>Ipomoea purpurea</i>                  | InMYB1               | AB232769                 |
| <i>Lilium hybrid division I</i>          | LhbHLH1              | BAE20057                 |
|                                          | LhbHLH2              | BAE20058                 |
| <i>Lotus japonicus</i>                   | LiTT8                | AB490778                 |
|                                          | LjGL3                | AB492284                 |
|                                          | LjTT2a               | BAG12893.1               |
|                                          | LjTT2b               | BAG12894                 |
|                                          | LjTT2c               | BAG12895                 |
| <i>Malus domestica</i>                   | MdbHLH3              | ADL36597                 |
|                                          | MdbHLH33             | ABB84474                 |
|                                          | MdMYB3               | JN544704                 |
|                                          | MdMYBA               | AB279598                 |
| <i>Morella rubra</i>                     | MrMYB1               | GQ340767                 |
| <i>Medicago truncatula</i>               | MtMYB2               | XM_003616340             |
| <i>Perilla frutescens</i>                | MYC-RP               | AB024050                 |
| <i>Capsella rubella</i>                  | CrCOP1               | XM_023784273.1           |
| <i>Nicotiana tabacum</i>                 | NtAN1a               | HQ589208                 |
|                                          | NtAN1b               | HQ589209                 |
|                                          | NtJAF13              | KF298397                 |
| <i>Pyrus communis</i>                    | PcMYB10              | EU153575                 |
| <i>Perilla frutescens</i>                | PfF3G1               | AB103172                 |
| <i>Petunia x hybrida</i>                 | PhAN1                | AAG25928                 |
|                                          | PhAN11               | AAC18914.1               |
|                                          | PhAN2                | AAF66727.1               |
|                                          | PhJAF13              | AAC39455                 |
|                                          | PhMYB27              | AHX24372                 |
|                                          | PhMYB4               | ADX33331.1               |
| <i>Prunus persica</i>                    | PpMYB10              | EU155160                 |
|                                          | PpMYB18              | KT159234                 |
| <i>Populus trichocarpa</i>               | PtMYB134             | FJ573151                 |
|                                          | PtMYB165             | XP_002315890.2           |
|                                          | PtMYB182             | XP_002305872.1           |



|                                        |            |                |
|----------------------------------------|------------|----------------|
| <i>Ricinus communis</i>                | RcCOP1     | XP_002534127.1 |
| <i>Raphanus sativus</i>                | RsTT8      | KY651179       |
|                                        | RsTTG1     | XP_018484504.1 |
| <i>Solanum tuberosum</i>               | StAN1      | JX848659       |
|                                        | StMTF1     | EU310399       |
| <i>Trifolium repens</i>                | Tr-MYB134  | KT699109       |
|                                        | Tr-MYB7    | KT699107       |
| <i>Vitis labrusca x Vitis vinifera</i> | VIMYBA1-1  | AB073010       |
| <i>Vitis vinifera</i>                  | VvMYB4a    | ABL61515.1     |
|                                        | VvMYB4b    | ACN94269.1     |
|                                        | VvMYBC1    | ACC68685       |
|                                        | VvMYBC2-L1 | AFX64995.1     |
|                                        | VvMYBC2-L2 | ACX50288.2     |
|                                        | VvMYBC2-L3 | AIP98385.1     |
|                                        | VvMYBF1    | GQ423422       |
|                                        | VvMYBPA2   | EU919682       |
|                                        | VvMYCA1    | ABM92332       |
| <i>Zea mays</i>                        | ZmB        | CAA40544       |
|                                        | ZmIN1      | AAB03841       |
|                                        | ZmLC       | P13526         |
|                                        | ZmMYB-IF35 | AF521880       |
|                                        | ZmPAC1     | NP_001310302.1 |
| <i>Morus alba L. cv. 'hongguo2'</i>    | bHLH3      | MN337861       |
|                                        | GL3        | MN337862       |
|                                        | MYB4       | MN337865       |
|                                        | MYBA       | MN337857       |
|                                        | MYBF       | MN337864       |
|                                        | TT2L1      | MN337859       |
|                                        | TT2L2      | MN337858       |
|                                        | TT2L3      | MN337860       |
|                                        | TTG1       | MN337863       |
| <i>Morus notabilis C.K. Schneid</i>    | Morus24997 | EXB39302.1     |
|                                        | Morus25446 | EXC01078.1     |
|                                        | CYP75B1    | EXC06425.1     |
|                                        | CYP75B2    | EXC06424.1     |
| <i>Allium cepa</i>                     | F3'H       | AY541035.1     |
| <i>Arabidopsis thaliana</i>            | F3'H       | AF271651.1     |
| <i>Callistephus chinensis</i>          | F3'5'H     | AF313489       |
|                                        | F3'H       | FJ216428.1     |
| <i>Campanula medium</i>                | F3'5'H     | D14590.1       |
| <i>Coptis japonica</i>                 | CYP80B2    | AB025030.1     |
| <i>Delphinium grandiflorum</i>         | F3'5'H     | AY856345.1     |
| <i>Eschscholzia californica</i>        | CYP80B1    | AF014801.1     |
| <i>Gentiana triflora</i>               | F3'5'H     | D85184.1       |
|                                        | F3'H       | AB193313.1     |
| <i>Gerbera hybrida</i>                 | F3'H       | DQ218417       |
| <i>Glycine max</i>                     | F3'H       | AF499731.1     |
|                                        | F3'5'H     | AY117551.1     |
| <i>Gossypium hirsutum</i>              | F3'5'H     | AY275430.1     |
| <i>Hieracium pilosella</i>             | F3'H       | DQ319866       |
| <i>Ipomoea nil</i>                     | F3'H       | AB113264.1     |
| <i>Lycianthes rantonneti</i>           | F3'5'H     | AF313490.1     |
| <i>Matthiola incana</i>                | F3'H       | AF313491.1     |
| <i>Nierembergia sp.</i>                | F3'5'H     | AB078514.1     |
| <i>Osteospermum hybrida</i>            | F3'5'H     | KP899545       |
|                                        | F3'H       | DQ250711       |
| <i>Oryza sativa</i>                    | F3'H       | XP_015613041.1 |
|                                        | F3'Hb      | AK070442       |
| <i>Pelargonium hortorum</i>            | F3'H       | AF315465.1     |
| <i>Pericallis cruenta</i>              | F3'5'H     | AY791885       |
| <i>Perilla frutescens</i>              | F3'H       | AB045593.1     |
| <i>Petunia x hybrida</i>               | F3'H       | AF155332.1     |
|                                        | F3'5'H     | AY245545.1     |
| <i>Solanum melongena</i>               | F3'5'H     | X70824.1       |
| <i>Solanum tuberosum</i>               | F3'5'H     | AY675559.1     |
| <i>Torenia hybrida</i>                 | F3'5'H     | AB012925.1     |
|                                        | F3'H       | AB057673.1     |
| <i>Vinca major</i>                     | F3'5'H     | AB078781.1     |

**Supplemental Table S10. Transcription factors correlated with *bHLH3* expression in connection network**

| ID in       |             |        |                                                                              |                      |
|-------------|-------------|--------|------------------------------------------------------------------------------|----------------------|
| MorusDB     | Family      | Symbol | Description                                                                  | Correlation          |
| L484_012139 | bZIP        | BZIP61 | Transcription factor RF2b [Morus notabilis]                                  | Positive correlation |
| L484_020313 | MYB_related | -      | PREDICTED: protein RADIALIS-like 4 [Theobroma cacao]                         | Positive correlation |
| L484_022975 | MYB         | -      | MYB4 [Morus notabilis]                                                       | Positive correlation |
| L484_020177 | ERF         | ERF012 | Ethylene-responsive transcription factor [Morus notabilis]                   | Positive correlation |
| L484_019376 | bHLH        | ORG2   | Transcription factor ORG2 [Morus notabilis]                                  | Positive correlation |
| L484_013609 | ZF-HD       | -      | Mini zinc finger 2 isoform 2, partial [Theobroma cacao]                      | Positive correlation |
| L484_014404 | S1Fa-like   | S1FA1  | DNA-binding protein S1FA1 [Morus notabilis]                                  | Positive correlation |
| L484_016991 | C2H2        | -      | Transcriptional regulator TAC1 [Morus notabilis]                             | Positive correlation |
| L484_001828 | Dof         | DOF1.2 | Dof zinc finger protein [Morus notabilis]                                    | Positive correlation |
| L484_003860 | WRKY        | WRKY44 | WRKY transcription factor 44 [Morus notabilis]                               | Positive correlation |
| L484_026215 | HD-ZIP      | GL2    | Homeobox-leucine zipper protein GLABRA 2 [Morus notabilis]                   | Positive correlation |
| L484_000097 | MYB         | -      | Transcription factor [Morus notabilis]                                       | Positive correlation |
| L484_004072 | TALE        | -      | Homeobox protein [Morus notabilis]                                           | Positive correlation |
| L484_009669 | DBB         | -      | Zinc finger protein CONSTANS-LIKE 2 [Morus notabilis]                        | Negative correlation |
| L484_023484 | LBD         | LBD11  | lateral organ boundaries domain protein [Boehmeria nivea]                    | Positive correlation |
| L484_012905 | MYB_related | ETC1   | PREDICTED: MYB-like transcription factor ETC1 [Eucalyptus grandis]           | Positive correlation |
| L484_007959 | MIKC        | -      | Floral homeotic protein DEFICIENS [Morus notabilis]                          | Positive correlation |
| L484_017595 | MYB_related | -      | TRIPTYCHO (TRY) [Arabidopsis thaliana]                                       | Positive correlation |
| L484_001405 | M-type      | -      | PREDICTED: transcription factor of morphogenesis MCM1-like [Ziziphus jujuba] | Positive correlation |
| L484_004404 | AP2         | -      | AP2-like ethylene-responsive transcription factor [Morus notabilis]          | Positive correlation |
| L484_006971 | B3          | -      | PREDICTED: auxin response factor 16-like [Citrus sinensis]                   | Positive correlation |
| L484_020870 | YABBY       | -      | YABBY protein [Corchorus olitorius]                                          | Positive correlation |
| L484_018706 | MYB         | -      | Transcription factor [Morus notabilis]                                       | Positive correlation |
| L484_027360 | MYB         | C1     | Anthocyanin regulatory C1 protein [Morus notabilis]                          | Positive correlation |
| L484_015439 | bHLH        | BHLH75 | PREDICTED: transcription factor bHLH75-like isoform X4 [Prunus mume]         | Positive correlation |
| L484_016584 | B3          | -      | B3 domain-containing transcription factor NGA4 [Morus notabilis]             | Positive correlation |
| L484_021618 | ERF         | -      | Ethylene-responsive transcription factor [Morus notabilis]                   | Positive correlation |
| L484_022665 | MYB         | MYB86  | Transcription factor [Morus notabilis]                                       | Positive correlation |
| L484_012134 | NAC         | -      | NAC domain-containing protein 29 [Morus notabilis]                           | Positive correlation |
| L484_019377 | bHLH        | -      | Transcription factor ORG2 [Morus notabilis]                                  | Positive correlation |
| L484_019377 | bHLH        | -      | Transcription factor ORG2 [Morus notabilis]                                  | Positive correlation |
| L484_026077 | bHLH        | -      | PREDICTED: transcription factor bHLH96-like [Glycine max]                    | Positive correlation |
| L484_006054 | NAC         | NAC072 | NAC domain-containing protein 72 [Morus notabilis]                           | Negative correlation |
| L484_006652 | C2H2        | -      | Zinc finger protein ZAT4 [Morus notabilis]                                   | Positive correlation |
| L484_012750 | HD-ZIP      | -      | Homeobox-leucine zipper protein ATHB-16 [Morus notabilis]                    | Positive correlation |
| L484_008831 | NAC         | NAC083 | NAC domain-containing protein 29 [Morus notabilis]                           | Positive correlation |
